1 **MYB12 spatiotemporally represses TMO5/LHW-mediated transcription in the**  
2 **Arabidopsis root meristem**

3

4 Short title: MYB12 represses TMO5/LHW activity

5

6 Brecht Wybouw<sup>1,2,\*</sup>, Helena E. Arents<sup>1,2,\*</sup>, Baojun Yang<sup>1,2</sup>, Jonah Nolf<sup>1,2</sup>, Wouter Smet<sup>1,2</sup>,  
7 Michael Vandorpe<sup>1,2</sup>, Daniël Van Damme<sup>1,2</sup>, Matouš Glanc<sup>1,2,#</sup> and Bert De Rybel<sup>1,2,#,†</sup>

8

9 <sup>1</sup> Ghent University, Department of Plant Biotechnology and Bioinformatics, Technologiepark 71,  
10 9052 Ghent, Belgium

11 <sup>2</sup> VIB Centre for Plant Systems Biology, Technologiepark 71, 9052 Ghent, Belgium

12 \* These authors contributed equally

13 # Co-senior authors

14 † Corresponding author. Email: beryb@psb.vib-ugent.be (B.D.R.)

15

16 **Abstract:**

17 Transcriptional networks are crucial to integrate various internal and external signals into  
18 optimal responses during plant growth and development. Primary root vasculature patterning and  
19 proliferation are controlled by a network centred around the basic Helix-Loop-Helix  
20 transcription factor complex formed by TARGET OF MONOPTEROS 5 (TMO5) and  
21 LONESOME HIGHWAY (LHW), which control cell proliferation and orientation by  
22 modulating cytokinin response and other downstream factors. Despite recent progress, many  
23 aspects of the TMO5/LHW pathway are not fully understood. In particular, the upstream  
24 regulators of TMO5/LHW activity remain unknown. Here, using a forward genetic approach to  
25 identify new factors of the TMO5/LHW pathway, we discovered a novel function of the MYB-  
26 type transcription factor MYB12. MYB12 physically interacts with TMO5 and dampens the  
27 TMO5/LHW-mediated induction of direct target gene expression as well as the periclinal/radial  
28 cell divisions. The expression of *MYB12* is activated by the cytokinin response, downstream of  
29 TMO5/LHW, resulting in a novel MYB12-mediated negative feedback loop that restricts  
30 TMO5/LHW activity to ensure optimal cell proliferation rates during root vascular development.

31 **Introduction:**

32 Transcription factors (TFs) play a crucial role in controlling virtually all developmental  
33 processes in eukaryotes by regulating the expression of specific subsets of target genes. TFs do  
34 not typically act alone but are embedded in complex transcriptional networks, which modulate  
35 their activity to ensure optimal transcriptional output in response to various environmental and  
36 developmental signals. Transcriptional networks often rely on feedback regulation, where a TF  
37 promotes the expression of its own activator (positive feedback) or of its repressor (negative  
38 feedback), respectively (Ohashi-Ito and Fukuda, 2020).

39 During vascular development in the plant embryo and primary root apical meristem, the  
40 heterodimer complex formed by the basic Helix-Loop-Helix (bHLH) TFs TARGET OF  
41 MONOPTEROS 5 (TMO5) and LONESOME HIGHWAY (LHW) controls vascular cell  
42 proliferation leading to radial expansion of the vascular bundle (Ohashi-Ito and Bergmann, 2007;  
43 De Rybel et al., 2013; Ohashi-Ito et al., 2013; De Rybel et al., 2014; Ohashi-Ito et al., 2014). The  
44 TMO5/LHW dimer is active in xylem cells, where it directly activates the expression of  
45 *LONELY GUY 3 (LOG3)*, *LOG4* and *BETA GLUCOSIDASE 44 (BGLU44)*, encoding key  
46 enzymes in the biosynthesis and deconjugation of cytokinin (Kurakawa et al., 2007; Kuroha et  
47 al., 2009; De Rybel et al., 2014; Ohashi-Ito et al., 2014; Yang et al., 2021). This leads to a local  
48 increase of cytokinin, which is thought to diffuse to the neighbouring procambium cells (De  
49 Rybel et al., 2014; Ohashi-Ito et al., 2014) and trigger the expression of members of the DNA-  
50 BINDING WITH ONE FINGER (DOF) type TF family (Miyashima et al., 2019; Smet et al.,  
51 2019). These DOF-type TFs in turn lead to a switch in division plane orientation from anticlinal  
52 to periclinal and radial in specific subsets of procambium and phloem pole cells, depending on  
53 the DOF family member. The actual molecular mechanisms are however not yet fully explored  
54 (Otero S., 2021). The activity of the TMO5/LHW complex is negatively regulated by members  
55 of the SUPPRESSOR OF ACAULIS51-LIKE (SACL) subclade of bHLH TFs (Katayama et al.,  
56 2015; Vera-Sirera et al., 2015). Similarly, to TMO5, SACLs physically interact with LHW. By  
57 competing with TMO5 for LHW binding, the SACLs reduce the amount of functional  
58 TMO5/LHW complexes, and thus dampen the activity of the pathway (Katayama et al., 2015;  
59 Vera-Sirera et al., 2015). As *SACL* genes are themselves downstream targets of TMO5/LHW,  
60 they constitute a typical negative feedback loop (Katayama et al., 2015; Vera-Sirera et al., 2015).

61 Besides forming bHLH homo- or heterodimers, bHLH proteins have also been shown to directly  
62 interact with other proteins such as MYB-type TFs, which can enhance or suppress their  
63 transcriptional activity (Zhao et al., 2008; Carretero-Paulet et al., 2010; Feller et al., 2011; Cui et  
64 al., 2021). MYB TFs are defined by their highly conserved DNA-binding MYB-domain that  
65 contains up to four  $\alpha$ -helical “R” repeats (Ogata et al., 1996; Du et al., 2009). The class (R1, R2  
66 or R3, depending on their similarity to c-Myb R repeats) and number of the R repeats are the  
67 basis of MYB protein classification (Dubos et al., 2010). Most plant MYBs belong to the R2R3-  
68 MYB subfamily (Stracke et al., 2001), which is involved in a plethora of processes including  
69 phenylpropanoid biosynthesis (Liu et al., 2015), development of tissues and organs  
70 (Oppenheimer et al., 1991; Lee and Schiefelbein, 1999) and hormonal responses (Jin and Martin,  
71 1999). Exemplary bHLH-MYB interactions take place during epidermal cell fate specification.  
72 The formation of trichomes and root hairs depends on the assembly of different heterotrimeric  
73 bHLH/WD40/MYB complexes. In addition to the WD40 protein TRANSPARENT TESTA  
74 GLABRA 1 (TTG1), the core bHLH proteins GLABRA 3 (GL3) or ENHANCER OF GLABRA  
75 3 (EGL3) interact with the R2R3 MYB proteins WEREWOLF (WER) or GLABRA 1 (GL1),  
76 forming an active transcriptional complex that promotes root hair or trichome formation,  
77 respectively. Alternatively, the recruitment of CAPRICE (CPC), TRIPTYCHON (TRY) or  
78 ENHANCER OF TRY AND CPC 1, single-repeat R3 MYBs that lack the C-terminal  
79 transcriptional activation domain and compete with the transcriptional activating R2R3 MYBs  
80 for bHLH binding, results in the formation of a transcriptional inactive complex that prevents  
81 trichome/root hair formation (Wada et al., 1997; Kirik et al., 2004; Ramsay and Glover, 2005;  
82 Tominaga-Wada et al., 2017). The single-repeat R3 MYBs are downstream targets of the active  
83 MYB/bHLH/WD40 complex, and at the same time its non-cell autonomous inhibitors. The  
84 bHLH and MYB TFs thus constitute a negative feedback loop that lies at the core of epidermal  
85 cell type specification and patterning (Wang et al., 2008; Song et al., 2015). A similar  
86 bHLH/MYB/WD40 complex controls the expression of a core enzyme in the proanthocyanin  
87 biosynthetic pathway (Appelhagen et al., 2011; Xu et al., 2013; Xu et al., 2015). As such,  
88 interactions between MYB and bHLH TFs are key to various developmental processes.  
89 The closely related R2R3 MYB proteins MYB11, MYB12 and MYB111 promote the expression  
90 of genes encoding key flavonol biosynthetic enzymes (Mehrtens et al., 2005; Stracke et al., 2007;  
91 Stracke et al., 2010; Stracke et al., 2017). Flavonols are a subgroup of flavonoids, besides the red

92 to purple anthocyanins and brown proanthocyanidins (Winkel-Shirley, 2001; Lepiniec et al.,  
93 2006). Flavonoids convey color to fruits and seeds and aid in abiotic stress response (Wang et  
94 al., 2016). MYB11, MYB12 and MYB111 induce flavonol biosynthesis at different  
95 developmental stages, depending on their distinct expression patterns: While MYB12 is mostly  
96 active in roots, MYB11 acts in meristematic tissues and MYB111 functions in the hypocotyl and  
97 cotyledons (Stracke et al., 2007). The genes encoding flavonol biosynthesis enzymes  
98 *CHALCONE SYNTHASE (CHS)*, *CHALCONE FLAVANONE ISOMERASE (CHI)*,  
99 *FLAVANONE 3'-HYDROXYLASE (F3'H)*, and *FLAVONOL SYNTHASE (FLS)* catalyze  
100 consecutive steps of flavonol production (Forkmann and Martens, 2001) and are regulated by  
101 MYB TFs via the MYB recognition element in their promoter regions. *CHS* and *FLS* are directly  
102 transcriptionally activated by MYB12 (Mehrtens et al., 2005). Consequently, the levels of the  
103 flavonols kaempferol and quercetin are decreased in the *myb12* mutant, while *MYB12*  
104 overexpression leads to increased flavonol levels (Mehrtens et al., 2005).  
105 Here, we discover a novel role of MYB12 as a negative regulator of the TMO5/LHW pathway  
106 during vascular proliferation. *MYB12* is a downstream target of *TMO5/LHW*; interacts with  
107 TMO5 and represses TMO5/LHW transcriptional activity, thus constituting a negative feedback  
108 loop in the regulation of vascular development. Our work highlights the importance of bHLH-  
109 MYB interactions in multiple developmental processes; and demonstrates concomitant activator  
110 and repressor functions of the same TF in different transcriptional network contexts.

111

## 112 **Results:**

### 113 *A mutant screen identifies modulators of TMO5/LHW activity*

114 In order to identify novel regulators of TMO5/LHW activity leading to vascular proliferation via  
115 control of oriented cell divisions, we designed an EMS-based forward genetic screen in the  
116 previously described dexamethasone (DEX)-inducible *pRPS5A::TMO5:GR* x  
117 *pRPS5A::LHW:GR* double misexpression line (double GR or dGR) in Col-0 background (Smet  
118 et al., 2019). Upon exogenous DEX treatment, root apical meristem width is increased in this  
119 line due to the ectopic periclinal and radial cell divisions (De Rybel et al., 2013), protoxylem  
120 differentiation is inhibited due to increased cytokinin levels (De Rybel et al., 2014) and  
121 additionally, primary root length is reduced (De Rybel et al., 2013) (**Fig. 1A-H, Table S1**). We  
122 reasoned those mutations in positive/negative regulators of the TMO5/LHW pathway would

123 suppress/enhance these dGR phenotypes. Although the TMO5/LHW activity was previously  
124 shown by a detailed quantification of the vascular cell file number (Arents et al., 2022), such  
125 experiments are labour intensive and require fixed samples, making them incompatible with  
126 high-throughput screening. We thus first evaluated whether root length and meristem width  
127 could serve as reliable read-outs for TMO5/LHW activity and hence vascular cell proliferation  
128 capacity, by plotting the root length or root width parameters against the number of quantified  
129 vascular cell files in multiple transgenic lines with increasing levels of TMO5/LHW heterodimer  
130 activity (Col-0, *pRPS5A::LHW:GR*, *pRPS5A::TMO5:GR*, the inducible dGR line and a  
131 constitutive double TMO5/LHW misexpression line). We observed a clear inverse correlation  
132 between root length and TMO5/LHW activity and a positive correlation between root width and  
133 TMO5/LHW activity (**Fig. 11-J, Table S1**). These results suggest that root length and width can  
134 serve as reliable proxies for the number of vascular cell file number and thus TMO5/LHW  
135 activity.

136 Having established the screening strategy, we performed EMS mutagenesis of dGR seeds and  
137 screened 228 pools of EMS mutagenized M<sub>2</sub> dGR seedlings for alterations in root length upon  
138 DEX induction. This first round of selection yielded 310 candidate mutants from 110 pools, of  
139 which 260 produced viable M<sub>3</sub> seeds. In total, 50 albino plants were observed among these 228  
140 pools of mutants, suggesting that the EMS mutagenesis was successful (Micol-Ponce et al.,  
141 2014). In the M<sub>3</sub> generation, we quantified both root length and root meristem width of the 260  
142 candidate mutants (**Fig. 2**), resulting in 20 validated mutants with reduced responses (*insensitive*  
143 *1-20*, *ins1-20*) and 2 mutants showing hypersensitive responses (*hypersensitive 1-2*, *hyp1-2*)  
144 (**Fig. S1-3, Table S1**). We next performed a detailed quantification of the vascular cell file  
145 number as the read-out of TMO5/LHW activity used previously (Ohashi-Ito and Bergmann,  
146 2007; De Rybel et al., 2013; Ohashi-Ito et al., 2013; De Rybel et al., 2014; Ohashi-Ito et al.,  
147 2014). Notably, 8 insensitive and 1 hypersensitive mutants already showed a respectively  
148 significantly reduced number of vascular cell files in mock conditions (**Fig. 3, Table S1**),  
149 suggesting that these mutants might inherently have differential TMO5/LHW activity and further  
150 confirming that our multi-step screening procedure using root length and width as proxies was  
151 successful. A segregation analysis further showed that the observed phenotypes in *ins2* and *ins7*  
152 could not be explained by a recessive mutation at a single locus (**Table S2**). These mutants were  
153 therefore excluded from further analysis. We finally focussed our attention to the mutants with

154 the most pronounced phenotype in each category: *ins4* and *hyp2* (**Fig. 3, Table S1**), and mapped  
155 the causal mutations by next generation sequencing.

156

### 157 *A strong lhw allele is causal to the ins4 phenotype*

158 The insensitive *ins4* mutant showed a strong reduction in the number of vascular cell files under  
159 mock condition and an almost complete repression of the increased root thickness upon DEX  
160 treatment (**Fig. 3, Fig. S1, Table S1**). Sequencing and SHORE map analysis (Schneeberger et  
161 al., 2009) revealed that *ins4* carried a premature stop codon in *LHW* (**Fig. 4A**). Similar to  
162 published *lhw* mutant alleles (Ohashi-Ito and Bergmann, 2007; Parizot et al., 2008; De Rybel et  
163 al., 2013; Ohashi-Ito et al., 2013), the *ins4* mutant showed a monarch vascular architecture in the  
164 primary root meristem, resulting in an off-centre xylem bundle during secondary growth (**Fig.**  
165 **4B-H, Table S1**). The number of vascular cell files could also be rescued by exogenous  
166 cytokinin application (**Fig. 4I, Table S1**) as was shown before to bypass the TMO5/LHW  
167 dependent cytokinin biosynthesis (De Rybel et al., 2014). Taken together, the mapping and  
168 phenotypic characterization show that *ins4* is a novel, strong *lhw* allele. We thus termed *ins4* as  
169 *lhw-8*. As TMO5/LHW activity is highly dose-dependent (De Rybel et al., 2013; Ohashi-Ito et  
170 al., 2013; De Rybel et al., 2014; Ohashi-Ito et al., 2014; Smet et al., 2019), mutations in TMO5  
171 or LHW were an expected outcome of our screen. Therefore, although *ins4* / *lhw-8* itself does not  
172 provide new insight into the regulation of TMO5/LHW activity, it further confirms that our  
173 screening set-up was successful and yielded relevant mutants.

174

### 175 *hyp2 is a novel myb12 allele*

176 At the other side of the selected mutant spectrum, the recessive *hyp2* mutant showed little or no  
177 aberrant phenotype under normal growth conditions, but a strong hypersensitive response upon  
178 DEX treatment (**Fig. 3, Fig. 5N, Fig. S1, Table S1**). SHORE map analysis (Schneeberger et al.,  
179 2009) identified an early stop codon in the gene encoding the R2R3 transcription factor MYB12  
180 (**Fig. 5A**). To confirm the causality of the *MYB12* mutation for the observed dGR hypersensitive  
181 phenotype, we first crossed the previously published *myb11 myb12-1f myb111* triple mutant  
182 (Stracke et al., 2007) into our dGR parental line. A hypersensitive response comparable to *hyp2*  
183 was detected in the *dGR myb11 myb12-1f myb111* mutant (**Fig. 5B-I, N, Table S1**). This triple  
184 mutant also did not show an aberrant phenotype under mock conditions in the Col-0 control

185 background (**Fig. 5B, H, N, Table S1**). Next, we complemented the *hyp2* mutant with a  
186 construct driving the *MYB12* coding sequence from the meristematic *RPS5A* promoter (Weijers  
187 et al., 2001). The *pRPS5A::MYB12* line showed a mild repression of the number of vascular cell  
188 files in mock conditions, which was correlated with *MYB12* expression levels as determined by  
189 qRT-PCR analysis (**Fig. S4A-B, Table S1**). Upon DEX treatment, *pRPS5A::MYB12* construct  
190 strongly repressed the TMO5/LHW induced vascular cell proliferation (**Fig. 5J-N, Table S1**).  
191 Taken together, *hyp2* is a novel mutant allele of *MYB12*, which we designated as *myb12-2*. Our  
192 initial results hint towards a new function for this TF and suggest that MYB12 might act as a  
193 negative regulator of the TMO5/LHW pathway.

194 Additionally, we previously found that *MYB12* is transcriptionally upregulated upon  
195 TMO5/LHW induction in the dGR line (Smet et al., 2019) (**Fig. 6A**) and validated this result by  
196 qRT-PCR analysis (**Table S1**). Given the slow induction kinetics compared to direct  
197 TMO5/LHW target genes such as *LOG4* (De Rybel et al., 2014; Ohashi-Ito et al., 2014), we  
198 hypothesized that the induction of *MYB12* is likely indirect and possibly triggered by cytokinin  
199 signalling downstream of TMO5/LHW (De Rybel et al., 2014; Ohashi-Ito et al., 2014). Indeed,  
200 we found *MYB12* to be cytokinin inducible by qRT-PCR analysis (**Fig. 6B, Table S1**),  
201 confirming previous reports (Brenner and Schmulling, 2012). These results suggest that *MYB12*  
202 might be part of a negative feedback loop where TMO5/LHW, via increased cytokinin  
203 signalling, activates its own repressor to modulate vascular proliferation rates.

204

205

### 206 ***MYB12 represses TMO5/LHW transcriptional activity***

207 One possible way how MYB12 could repress TMO5/LHW is by altering the downstream  
208 cytokinin response. To test this hypothesis, we analysed the inhibition of root length caused by  
209 increasing concentrations of exogenously applied cytokinin in *myb12* mutants. No major  
210 differences in cytokinin sensitivity were observed between either *myb12* allele and their  
211 respective control lines under mock conditions (Col-0 for *myb12-1f* and dGR for *hyp2/myb12-2*)  
212 (**Fig. S5, Table S1**), suggesting the repression of TMO5/LHW activity does not act at the level  
213 of cytokinin signalling or perception. Next, we tested possible repression at the level of the  
214 activity of the TMO5/LHW heterodimer itself by analysing the expression levels of direct  
215 TMO5/LHW target genes in the *hyp2/myb12-2* and *pRPS5A::MYB12 hyp2/myb12-2* dGR lines

216 in comparison to the dGR control. The expression levels of the direct target genes *LOG4* and  
217 *GHI0* can be used as molecular read-out of TMO5/LHW activity (De Rybel et al., 2014; Ohashi-  
218 Ito et al., 2014; Vera-Sirera et al., 2015). Upon DEX treatment, relative expression levels of  
219 *LOG4* and *GHI0* were induced in control (dGR) and *hyp2/myb12-2* in dGR backgrounds (**Fig.**  
220 **6C, Table S1**). In the *pRPS5A::MYB12 hyp2/myb12-2* dGR line, however, no induction in  
221 *LOG4* and *GHI0* expression was observed (**Fig. 6C, Table S1**), suggesting that MYB12 might  
222 directly inhibit TMO5/LHW activity. To verify these results, we next introduced the  
223 transcriptional reporter of *LOG4* (De Rybel et al., 2014) and a newly generated reporter for  
224 *GHI0* into the *pRPS5A::MYB12 hyp2/myb12-2* dGR line and the parental dGR line as control.  
225 Both the *pLOG4::n3GFP* and *pGHI0::n3GFP* transcriptional reporters showed a clear induction  
226 in expression strength and ectopic expression upon DEX treatment in dGR/+ background  
227 compared to a mock DMSO treatment (**Fig. 6D-E, H-I**). This induction was repressed in the  
228 *pRPS5A::MYB12/+ hyp2/+* dGR/+ background (**Fig. 6F-G, J-K**); confirming the qRT-PCR  
229 results (**Fig. 6C, Table S1**). Taken together, these results suggest that MYB12 represses  
230 TMO5/LHW activity by inhibiting direct target gene expression. Importantly, MYB12 does not  
231 contain a characteristic EAR motif associated with transcriptional repressors (Kagale and  
232 Rozwadowski, 2011; Liu et al., 2015) and directly activates transcription of the *CHS* and *FLS*  
233 genes (Mehrtens et al., 2005). This shows that MYB12 is thus not a typical transcriptional  
234 repressor, but represses TMO5/LHW transcriptional activity in another way.

235

### 236 *MYB12 non-competitively binds to TMO5 in xylem cells*

237 TMO5/LHW activity is known to be repressed by the SAFL bHLH proteins, which compete  
238 with TMO5 for binding to LHW and thus reduce the amount of active TMO5/LHW dimers  
239 (Katayama et al., 2015; Vera-Sirera et al., 2015). Given the well documented interactions  
240 between MYB and bHLH TFs (Zhao et al., 2008; Carretero-Paulet et al., 2010; Feller et al.,  
241 2011; Cui et al., 2021), we hypothesized that MYB12 function might involve direct binding to  
242 the TMO5/LHW complex, similar to the SAFL mode-of-action (Katayama et al., 2015; Vera-  
243 Sirera et al., 2015). Firstly, if MYB12 were to bind the TMO5/LHW complex, it would need to  
244 be present in the same cells. Therefore, we determined the spatiotemporal expression domain of  
245 *MYB12* by analysing a newly generated *pMYB12::nGFP/GUS* transcriptional reporter line.  
246 Although very faint expression was observed in young xylem cells, *MYB12* was found to be



247 broadly and strongly expressed in most cells from the elongation zone onwards; including xylem  
248 cells and in the columella cells (**Fig. 7A-B**). This expression domain fits with predictions from a  
249 recently published single cell atlas of the root apical meristem (Wendrich et al., 2020) (**Fig.**  
250 **S4C**). Given that TMO5 and LHW are expressed in xylem cells (De Rybel et al., 2013) (**Fig. 7C-**  
251 **D**), direct *in planta* binding of MYB12 to TMO5/LHW complex is possible.

252 Next, we thus tested the capacity of MYB12 to directly interact with TMO5 and/or LHW. Yeast-  
253 2-Hybrid (Y2H) analysis showed that MYB12 is able to bind to TMO5 (**Fig. 8A**). Binding of  
254 MYB12 to LHW could not be evaluated due to auto-activation in the yeast system (**Fig. 8B**). To  
255 provide confirmation of this interaction *in planta* using an independent system, we took  
256 advantage of the recently developed rapamycin-dependent Knock Sideways assay in transiently  
257 transformed *N. benthamiana* leaves (Winkler et al., 2021). This assay is based on the ability of  
258 FKBP and FRB protein domains to solely dimerize in presence of the drug rapamycin (Belshaw  
259 et al., 1996). In control conditions, we observed that simultaneous infiltration of plasmids  
260 carrying TMO5-GFP-FKB, MYB12-TagBFP2 and a mitochondria targeted FRB in *Nicotiana*  
261 *benthamiana* leaves resulted in nuclear localization of the TMO5 and MYB12 fusions, as  
262 expected from transcription factors (**Fig. 8C**). In the presence of rapamycin, TMO5-GFP-FKBP  
263 bound to mito-FRB and delocalized to the mitochondria; along with MYB12-TagBFP2 (**Fig.**  
264 **8D**). Taken together, these experiments show that TMO5 and MYB12 can directly interact *in*  
265 *vivo* and *in planta*. We next asked whether the MYB12/TMO5 interaction might prevent the  
266 formation of the TMO5/LHW complex; similarly to the competitive binding of LHW by SACL3  
267 and TMO5 (Katayama et al., 2015; Vera-Sirera et al., 2015). To test this hypothesis, we  
268 evaluated the interaction between TMO5 and LHW in the presence or absence of MYB12 in  
269 Yeast-3-Hybrid (Y3H) experiments (**Fig. 8E**). Although a few colonies occasionally showed  
270 auto-activation of TMO5 in presence of MYB12, all tested colonies showed a clear interaction  
271 between TMO5 and LHW in presence of MYB12, while the MYB12 negative control showed no  
272 growth on selective medium (**Fig. 8E**). We thus failed to identify a competitive inhibition by  
273 MYB12 of TMO5/LHW heterodimer formation in our yeast system. Although we have to be  
274 careful in concluding from a negative readout, these results suggest that MYB12 might not  
275 inhibit TMO5/LHW activity by competitive inhibition of the formation of the TMO5/LHW  
276 complex itself, as is the case for the SACL proteins (Katayama et al., 2015; Vera-Sirera et al.,  
277 2015).

278

279 Altogether, using forward genetics, we have identified the R2R3 MYB transcription factor  
280 MYB12 as a novel regulator of the TMO5/LHW pathway during root vascular proliferation.  
281 MYB12 directly interacts with TMO5 and represses the activity of the TMO5/LHW complex at  
282 the level of direct target gene expression. *MYB12* itself is a downstream target gene of the  
283 TMO5/LHW pathway, thus constituting a negative feedback loop which contributes to fine  
284 tuning the activity of the TMO5/LHW complex during vascular development.

285

### 286 **Discussion:**

287 The patterning and proliferation of the vascular bundle during primary root growth relies on a  
288 complex regulatory network of transcriptional, hormonal and other signals (De Rybel et al.,  
289 2016). The key heterodimeric bHLH transcription factor complex, TMO5/LHW, promotes  
290 cytokinin biosynthesis through the expression of *LOG3*, *LOG4* and *BGLU44* in the xylem cells  
291 (De Rybel et al., 2014; Ohashi-Ito et al., 2014; Yang et al., 2021). This locally produced  
292 cytokinin is thought to act as a mobile signal that coordinates the radial growth and correct  
293 patterning of the vascular bundle (Wybouw and De Rybel, 2019). In this study, we have taken a  
294 forward genetic approach to find new regulators of the TMO5/LHW pathway and discovered a  
295 novel function of the previously described transcription factor MYB12. Our data revealed that  
296 *myb12* mutants are hypersensitive to the gain-of-function phenotypes caused by TMO5/LHW  
297 misexpression, while *MYB12* misexpression represses vascular proliferation by inhibiting the  
298 transcriptional activation of direct TMO5/LHW targets genes. Moreover, *MYB12* is  
299 transcriptionally activated by the cytokinin response downstream of TMO5/LHW, and MYB12  
300 directly interacts with TMO5. All these findings indicate that MYB12 acts as a repressor of the  
301 *TMO5/LHW* transcriptional pathway, while at the same time being its downstream target. Hence,  
302 we have found a novel negative feedback loop regulating the TMO5/LHW transcriptional  
303 network via the action of MYB12.

304

305 This negative feedback loop is reminiscent of the previously described regulation of the  
306 TMO5/LHW pathway by the *SACL* genes. Nonetheless, there are several key differences  
307 between the MYB12- and *SACL*-mediated negative feedback loops. Firstly, *MYB12* appears to  
308 be a secondary TMO5/LHW target induced indirectly by the downstream cytokinin response,

309 while the *SACL* genes are direct targets of TMO5/LHW (Katayama et al., 2015; Vera-Sirera et  
310 al., 2015). This would suggest that the MYB12-mediated negative feedback is slower in  
311 comparison to the *SACL* loop, which might be important for spatiotemporal fine tuning  
312 TMO5/LHW activity. Furthermore, the cytokinin response levels are affected by numerous  
313 factors other than TMO5/LHW (Kieber and Schaller, 2018). Thus, the cytokinin-inducible  
314 MYB12 can, unlike the *SACL* proteins, help optimize vascular proliferation rates by integrating  
315 the TMO5/LHW activity with other developmental signals. In support of the *SACL*- and  
316 MYB12-mediated negative feedback loops acting on different spatiotemporal scales, *SACL* and  
317 *MYB12* have very distinct expression patterns. *SACLs* are co-expressed with *TMO5* and *LHW* in  
318 xylem cells in the root meristem zone (Vera-Sirera et al., 2015). *MYB12* is most prominently  
319 expressed in older root tissues from the differentiation zone onwards, consistent with providing  
320 slower and more indirect feedback. However, the *SACL* and MYB12 regulatory loops do not  
321 seem to be mutual exclusive, as *myb12* mutants are hypersensitive towards increased  
322 TMO5/LHW activity in the root meristem. Unfortunately, despite clear inhibitory effects on  
323 vascular proliferation in both *SACL* and *MYB12* gain-of-function lines, a lack of prominent  
324 aberrant phenotypes in the respective loss-of-function mutants makes it difficult to dissect the  
325 exact function of these genes during vascular development. This further emphasizes the  
326 pronounced genetic redundancy operating in plant development, especially during the control of  
327 such vital processes like vascular tissue patterning.

328

329 We have shown that MYB12 directly interacts with TMO5 and inhibits the transcriptional  
330 activation of direct TMO5/LHW target genes. Nonetheless, the exact molecular mechanism of  
331 MYB12 action remains partially unclear. In yeast, we could not show that MYB12 disrupts the  
332 TMO5/LHW complex formation like the *SACLs* do (Katayama et al., 2015; Vera-Sirera et al.,  
333 2015). Moreover, it does not contain an EAR or TLLLFR motif typical for MYB TF repressors  
334 (Kagale and Rozwadowski, 2011; Ma and Constabel, 2019). Additionally, MYB12 lacks the  
335 bHLH-binding motif present in other known bHLH-interacting MYB TFs (Zimmermann et al.,  
336 2004; Wang and Chen, 2014), and it functions as a bona fide transcriptional activator in other  
337 developmental contexts (Forkmann and Martens, 2001; Mehrrens et al., 2005). Therefore, the  
338 MYB12-mediated inhibition of TMO5/LHW activity must depend on another molecular  
339 mechanism.

340 In one scenario, MYB12 might act as a passive repressor by preventing TMO5/LHW interaction  
341 with DNA and/or recruitment of the RNA polymerase II complex (Kazan, 2006; Krogan and  
342 Long, 2009). Another and more likely possibility is that rather than acting as a conventional  
343 repressor, MYB12 might redirect TMO5/LHW activity away from *LOG4*, *GHI0* and other genes  
344 involved in vascular proliferation, and contribute to activating different TMO5/LHW target  
345 genes instead. This explanation would fit best with the previously described function of MYB12  
346 as a classical transcriptional activator of several genes in the flavonoid biosynthesis pathway  
347 (Forkmann and Martens, 2001; Mehrrens et al., 2005). Target gene specificity has previously  
348 been associated with the MYB TFs in heteromeric bHLH-MYB transcriptional complexes  
349 (Ramsay and Glover, 2005). TMO5-LIKE 1 (T5L1), a close homolog of TMO5, is able to  
350 promote ectopic xylem differentiation in addition to its role in promoting radial growth  
351 (Katayama et al., 2015); The same bHLH TF thus functions in two very different developmental  
352 processes that require the activation of completely different gene sets. It is conceivable that such  
353 alternative functionalities of bHLH TFs could be achieved by interactions with different MYBs.  
354 In such a scenario, the TMO5/LHW complex would recruit an unknown MYB TF to promote the  
355 expression of genes required for vascular proliferation, while the alternative recruitment of  
356 MYB12 would lead to the activation of different target genes. To take this speculation even  
357 further, the dual roles of MYB12 in flavonol biosynthesis (Forkmann and Martens, 2001;  
358 Mehrrens et al., 2005) and vascular proliferation (this study) could then be explained by  
359 alternative interactions with TMO5 and an unknown bHLH TF needed for MYB12-mediated  
360 induction of the *CHS* and *FLS* flavonol biosynthesis genes. Further investigations into the precise  
361 molecular mechanisms responsible for MYB12 as well as other related MYB TFs will be needed  
362 to shed light on these intriguing open questions and hypotheses.

363  
364 What is the biological meaning of the same transcription factor MYB12 being involved in  
365 flavonol biosynthesis as well as vascular proliferation is another open question arising from our  
366 study. Interestingly, the bHLH TF TRANSPARENT TESTA 8 (TT8) has been previously  
367 implied in flavonoid biosynthesis (Nesi et al., 2000) and trichome development (Maes et al.,  
368 2008), indicating that dual functions in different metabolic and developmental pathways might  
369 be a common feature of multiple transcription factors from different families. This might reflect  
370 the need of certain metabolic changes for a specific developmental process. For example,

371 trichomes are rich in biotic stress defence compounds which include flavonoids (Karabourniotis  
372 et al., 2020). Utilizing TT8 to control both trichome development and flavonoid biosynthesis  
373 might thus aid in coordinating the two processes. Likewise, the transition from vascular  
374 proliferation to differentiation might involve so far unappreciated metabolic changes in addition  
375 to the decline of TMO5/LHW activity, both hypothetically controlled by MYB12. Alternatively,  
376 dampening the TMO5/LHW pathway while promoting flavonoid biosynthesis might contribute  
377 to the balance between growth and defence processes. Different stresses often lead to increased  
378 reactive oxygen species levels, which can be mitigated by flavonoid antioxidant activity (Wang  
379 et al., 2016). In such conditions, attenuating the TMO5/LHW-mediated radial growth in favour  
380 of flavonoid biosynthesis by the increased MYB12 levels could be important for optimal  
381 resource allocation.

382

383 In summary, we have uncovered a novel role of the transcription factor MYB12 as a negative  
384 regulator of the TMO5/LHW pathway during vascular proliferation. The MYB12-mediated  
385 negative feedback loop is distinct from the modus operandi of the previously described SACL  
386 proteins in both molecular mechanism and spatiotemporal dynamics, showing that TMO5/LHW  
387 activity is being controlled using multiple distinct mechanisms. The full molecular details of  
388 MYB12 mode of action, as well as the biological meaning of its dual functions in vascular  
389 development and flavonoid biosynthesis, remain exciting challenges for future investigations.  
390 Our work establishes that a bona fide transcriptional activator can function as a repressor in a  
391 different transcriptional network. Furthermore, our results show that functional interactions  
392 between bHLH and MYB transcription factors are involved in multiple unrelated transcriptional  
393 networks, highlighting them as a powerful and possibly underappreciated developmental module.

394 **Materials and Methods:**

395

396 ***Plant material and growth conditions***

397 Seedlings were grown at 22°C under continuous light on ½ Murashige and Skoog (MS) medium  
398 without sucrose, after seeds were stratified for 24h-48h. For dexamethasone (DEX) treatment, 10  
399 µM DEX (Sigma-Aldrich) was added to the growth medium from a 10 mM DMSO stock  
400 solution; seedlings were either germinated on DEX-containing medium or transferred from MS  
401 medium at the indicated time point. For the CK sensitivity assay, seedlings were germinated on  
402 6-benzylaminopurine (6-BAP; Duchefa) -containing medium. The AGI identifiers for the genes  
403 used in this manuscript are as followed: *TMO5* (AT3G25710), *LHW* (AT2G27230), *MYB12*  
404 (AT2G47460), *LOG4* (AT3G53450), *GH10* (AT4G38650) and *ARR5* (AT3G48100). The  
405 following mutant and transgenic lines were described previously: *myb12-1f* (Mehrtens et al.,  
406 2005); *myb11 myb12-1f myb111* (*myb* triple) (Stracke et al., 2007); p*RPS5A::TMO5:GR* x  
407 p*RPS5A::LHW:GR* (dGR) (Smet et al., 2019); p*LOG4::n3GFP* (De Rybel et al., 2014). The lines  
408 *ins4/lhw-8* and *hyp2/myb12-2* were generated in the dGR background by EMS mutagenesis (see  
409 below). The lines p*GH10::n3GFP*, p*RPS5A::MYB12*, p*RPS5A::MYB12 hyp2* and  
410 p*MYB12::nGFP-GUS* were obtained by transforming the respective expression clones into Col-0  
411 or *hyp2* by the floral dip method (Clough and Bent, 1998). The p*LOG4::n3GFP* and  
412 p*GH10::n3GFP* were introduced into the dGR and p*RPS5A::MYB12 hyp2/myb12-2* dGR  
413 backgrounds by genetic crossing and analysed in F1 generation seedlings.

414 ***EMS mutagenesis and screening***

415 The dGR line (Smet et al., 2019) was used for the EMS mutagenesis. Approximately 10,000  
416 seeds were incubated shaking in water overnight. The water was replaced with 15 ml of 0.05 %  
417 Triton X-100. After mixing well, the seeds were incubated for 5 min in this solution then twice  
418 washed with water. The seeds were mutagenized by treatment with 30 mM EMS in 0.1 M  
419 phosphate buffer (pH 7.5) for 6-7 hours. Afterwards, the EMS solution was removed, and  
420 mutagenesis was stopped by adding 0.1 M Na<sub>2</sub>S<sub>2</sub>O<sub>3</sub> for 5 min five times. The Na<sub>2</sub>S<sub>2</sub>O<sub>3</sub> was  
421 washed away with water seven times. These seeds were afterwards stratified in 0.1% agarose  
422 overnight. Approximately 50 seeds were sown together in a pot per pool. A total of 228 pools  
423 was maintained. For each pool, about 1,000 M<sub>2</sub> seeds were initially screened on 10 µM DEX  
424 containing ½ MS media, leading to a selection of 260 mutants from 110 pools. Next, the root

425 length and root width of one-week-old M<sub>3</sub> seedlings was measured in both mock (DMSO) and  
426 10 μM DEX. Changes in root length and meristem width were measured upon DEX treatment  
427 and compared to a Col-0 and dGR control.

#### 428 ***Mapping causal mutation of EMS mutants***

429 Selected EMS mutants were backcrossed with the parental dGR line, and one-week-old BC<sub>1</sub>F<sub>2</sub>  
430 seedlings with the desired phenotype were collected for DNA extraction. DNA was extracted  
431 using hexadecyltrimethylammoniumbromide (CTAB) extraction buffer (0.1 M Tris pH7.5, 0.7M  
432 NaCl, 0.01 M EDTA and 0.03 M CTAB) and afterwards isolated using  
433 chloroform:isoamylalcohol (24:1) and isopropanol. RNA was degraded by RNase treatment  
434 between the chloroform and isopropanol isolation steps. The bulked genomic DNA was  
435 sequenced by using the Illumina NextSeq 500 system. For the library preparation, an insert size  
436 of 400-500 bp was used. Paired end sequencing was performed, with a read length of 2x150 bp  
437 length and 50x coverage. Potential causal mutations are selected by using the SHORE map  
438 analysis tool (Schneeberger et al., 2009).

#### 439 ***Molecular cloning***

440 The promoters and coding sequences were PCR amplified using a high-fidelity polymerase  
441 (primers used are shown in **Table S3**). All constructs were made by MultiSite Gateway cloning  
442 (Karimi et al., 2002). Promoter regions were amplified from genomic DNA and introduced into  
443 the *pDONRP4PIR* vector. The coding sequences were amplified from root cDNA and  
444 introduced into the *pDONR221* vector. All entry clones were sequence verified before further  
445 steps. The MYB12 promoter entry was cloned into pmK7S\*nF14mGW destination vector. The  
446 construct was transformed in Col-0 and dGR via Agrobacterium mediated flower dipping  
447 (Clough and Bent, 1998).

#### 448 ***Root phenotyping***

449 For root length measurements, one-week-old roots were scanned on a flatbed scanner and root  
450 length was measured by using the freeware program FIJI with the integrated NEURONJ plugin  
451 (<https://imagescience.org/meijering/software/neuronj/>) (Meijering et al., 2004). Root width of  
452 one-week-old seedlings were measured by dissecting the roots and mounting them in clearing  
453 agent (60 % lactic acid, 20 % glycerol and 20 % H<sub>2</sub>O). Width of the root tips was measured at  
454 the beginning of the elongation zone for all roots by using FIJI (Schindelin et al., 2012). Imaging

455 of differentiated primary xylem vessels was performed on one-week-old roots mounted in the  
456 clearing agent described above.

#### 457 ***Statistics and visualization of the data***

458 All boxplots were generated with BoxPlotR web tool (<http://shiny.chemgrid.org/boxplotr>). In  
459 these plots, the boxes indicate the median, 25th and 75th percentile of the data, the whiskers  
460 extend to minima and maxima within 2 SDs of the mean, and outliers are indicated as single  
461 empty circles. ‘n’ represents the number of data points. Pairwise comparisons were performed  
462 using standard two-sided Student’s T-testing. Student T-test significances asterisks: \* = p-value  
463 < 0.05; \*\* = p-value < 0.01; \*\*\* = p-value < 0.001. The lower-case letters associated with the  
464 boxplots indicate significantly different groups as determined by one-way or two-way ANOVA  
465 with post-hoc Tukey HSD testing (p<0.05).

#### 466 ***Confocal imaging***

467 Transcriptional and translational fluorescent reporter lines were imaged on a Leica SP8 confocal  
468 microscope with a 40x NA 1.1 water immersion objective. Seedlings were mounted in propidium  
469 iodide (PI); GFP and sYFP reporter lines were excited at 488, resp. 514 nm and detected at 500-  
470 535, resp. 515-550 nm; PI was detected at 600-700 nm. For the vascular cell file number  
471 measurements, one-week-old seedlings were fixed and stained using the mPS-PI protocol and  
472 imaged using the Leica SP2 or SP8 confocal microscopes as described previously (Truernit et al.,  
473 2008; Arents et al., 2022). The vascular bundle cell number quantifications included the  
474 pericycle cell layer, except if mentioned otherwise.

#### 475 ***RNA isolation and qRT-PCR***

476 For dGR induction, plants were grown on ½ MS (1% agar) for 5 days before transferring to  
477 either mock or 10 µM DEX for 2h. For CK treatment, 5-day-old seedlings were transferred to  
478 medium containing 10 µM 6-benzylaminopurine (6-BAP; Duchefa) from a 10 mM DMSO stock  
479 solution. All samples were ground in liquid nitrogen and RNA was extracted using RNA  
480 isolation protocol for non-fibrous tissue by the RNA Tissue Miniprep System (Promega).  
481 cDNA synthesis was done using 1µg of total RNA with the qScript™ cDNA Supermix kit  
482 (Quanta BioSciences). The qRT-PCR primers were designed by Universal Probe Library Design  
483 Center (Roche) (**Table S3**). The qRT-PCR was performed using *UBC* and *EEF* as reference  
484 genes on a Roche Lightcycler 480 device (Roche Molecular Systems Inc.) with SYBR Green I



485 Master kit (Roche). The gene expression analysis was done using qBase v3.2 software  
486 (Biogazelle, Zwijnaarde, Belgium - [www.qbaseplus.com](http://www.qbaseplus.com)).

#### 487 ***DNA extraction and genotyping***

488 Genomic DNA was isolated using the CTAB extraction method. The T-DNA mutants  
489 (*myb11*/SALK077068 and *myb111*/GK291D01) were genotyped using PCR based method  
490 (**Table S3**). The *myb12-1f* mutant (Mehrtens et al., 2005) was genotyped using cleaved amplified  
491 polymorphic sequence (CAPS). An amplicon of 547 bp was amplified (using primers described  
492 in **Table S3**), and was cut by using HphI restriction. The wild type allele is cut into two bands of  
493 399 bp and 148 bp, while the mutant remained uncut.

#### 494 ***Yeast-2-Hybrid (Y2H) and Yeast-3-Hybrid (Y3H) analysis***

495 The MYB12, TMO5 and LHW coding sequences were cloned into pDEST22 (Prey: GAL4AD-x  
496 Yeast selection marker: TRP1) and pDEST32 (Bait: GAL4DB-y Yeast selection marker: LEU2).  
497 These plasmids were transformed into *Saccharomyces cerevisiae* strain AH109 (Clontech). At  
498 least 3 independent yeast transformants were checked for each pairwise interaction according to  
499 (Cuellar et al., 2013) with minor modifications: the protein-protein interactions were validated  
500 with undiluted overnight yeast culture droplets manually pipetted on selective SD Base-Leu/  
501 Trp/-His and grown for 3-4 days at 30°C before imaging. The Y3H was performed as described  
502 in Yperman *et al* (2021) (Yperman et al., 2021). For the Y3H, bait and prey subunits (TMO5 and  
503 LHW) were cloned in pDEST32 and pDEST22 expression vectors and transformed via heat  
504 shock in the PJ69-4 $\alpha$  yeast strain. MYB12 was cloned in pAG416GPD (Yeast selection marker:  
505 URA3) and transformed via heat shock in the PJ69-4 $\alpha$  yeast strain. A and  $\alpha$  strains were mated  
506 and cultured in SD-Leu/-Trp/-Ura. Cultures were grown for 2 days and were diluted to OD600  
507 0.2, and 10  $\mu$ l was pipetted on SD-Leu/-Trp/-Ura and SD-Leu/-Trp/-Ura/-His and grown for 3  
508 days at 30°C, after which the plates were imaged.

#### 509 ***Knock sideways***

510 The knock sideways (KSD) assay was performed as described previously [52]. Briefly, *N.*  
511 *benthamiana* leaves were transiently transformed with the constructs p*G1090::XVE*>>MYB12-  
512 TagBFP2, p35S::TMO5-EGFP-FKBP and p35S::MITO-FRB. After ca. 24h, the transformed  
513 leaves were infiltrated with 1  $\mu$ M rapamycin or H<sub>2</sub>O mock control. Images were acquired 24-30  
514 h thereafter on a Leica SP8X confocal microscope in line sequential scanning mode. The  
515 p*G1090::XVE*>>MYB12-TagBFP2 was originally intended for estradiol-inducible expression,

516 but turned out very leaky in expression in the *N. benthamiana* system and was thus used for  
517 constitutive expression instead.

518

519 **Acknowledgements:**

520 The authors thank Ralf Stracke and Sofie Goormachtig for sharing the *myb111myb12-1f,myb111*  
521 and *myb12-f* mutant seeds, respectively; Davy Opdenacker for help with the EMS mutagenesis  
522 and Frederik Coppens for help with the SHOREmap analysis. This work was funded by The  
523 Research Foundation - Flanders (FWO; Odysseus II G0D0515N and post-doc fellowship  
524 1215820N); the Netherlands Organization for Scientific Research (NWO; VIDI 864.13.00); the  
525 European Research Council (ERC Starting Grant TORPEDO; 714055); the European Union's  
526 Horizon 2020 research and innovation programme under the Marie Skłodowska-Curie grant  
527 agreement No 885979 "DIVISION BELL"; EMBO (long term fellowship ALTF 1005-2019);  
528 and ERC consolidator Grant T-REX; 682436 to DVD.

529

530 **Author Contributions:**

531 B.D.R. conceived the project; B.D.R., M.G., D.V.D., B.W. and H.E.A. designed experiments;  
532 B.W. and W.S. performed EMS mutagenesis; B.W. and H.E.A. performed the EMS screening;  
533 B.W. performed the SHOREmap analysis; B.W. and H.E.A. analysed the role of MYB12; B.Y.  
534 and J.N. performed the Y2H experiments; M.G. and J.N. performed the knock sideways  
535 experiments; M.V. performed the Y3H experiments; B.D.R. and M.G. supervised the project and  
536 wrote the paper with input of all authors.

537 **References:**

- 538 Appelhagen, I., Jahns, O., Bartelniewoehner, L., Sagasser, M., Weisshaar, B., and Stracke, R.  
539 (2011). Leucoanthocyanidin Dioxygenase in *Arabidopsis thaliana*: characterization of mutant  
540 alleles and regulation by MYB-BHLH-TTG1 transcription factor complexes. *Gene* 484, 61-68.
- 541 Arents, H.E., Eswaran, G., Glanc, M., Mahonen, A.P., and De Rybel, B. (2022). Means to  
542 Quantify Vascular Cell File Numbers in Different Tissues. *Methods Mol Biol* 2382, 155-179.
- 543 Belshaw, P.J., Ho, S.N., Crabtree, G.R., and Schreiber, S.L. (1996). Controlling protein  
544 association and subcellular localization with a synthetic ligand that induces heterodimerization of  
545 proteins. *Proc Natl Acad Sci U S A* 93, 4604-4607.
- 546 Brenner, W.G., and Schmulling, T. (2012). Transcript profiling of cytokinin action in  
547 *Arabidopsis* roots and shoots discovers largely similar but also organ-specific responses. *BMC*  
548 *Plant Biol* 12, 112.
- 549 Carretero-Paulet, L., Galstyan, A., Roig-Villanova, I., Martinez-Garcia, J.F., Bilbao-Castro, J.R.,  
550 and Robertson, D.L. (2010). Genome-wide classification and evolutionary analysis of the bHLH  
551 family of transcription factors in *Arabidopsis*, poplar, rice, moss, and algae. *Plant Physiol* 153,  
552 1398-1412.
- 553 Clough, S.J., and Bent, A.F. (1998). Floral dip: a simplified method for *Agrobacterium*-mediated  
554 transformation of *Arabidopsis thaliana*. *Plant J* 16, 735-743.
- 555 Cuellar, A.P., Pauwels, L., De Clercq, R., and Goossens, A. (2013). Yeast two-hybrid analysis of  
556 jasmonate signaling proteins. *Methods Mol Biol* 1011, 173-185.
- 557 Cui, D., Zhao, S., Xu, H., Allan, A.C., Zhang, X., Fan, L., Chen, L., Su, J., Shu, Q., and Li, K.  
558 (2021). The interaction of MYB, bHLH and WD40 transcription factors in red pear (*Pyrus*  
559 *pyrifolia*) peel. *Plant Mol Biol* 106, 407-417.
- 560 De Rybel, B., Mahonen, A.P., Helariutta, Y., and Weijers, D. (2016). Plant vascular  
561 development: from early specification to differentiation. *Nat Rev Mol Cell Biol* 17, 30-40.
- 562 De Rybel, B., Moller, B., Yoshida, S., Grabowicz, I., Barbier de Reuille, P., Boeren, S., Smith,  
563 R.S., Borst, J.W., and Weijers, D. (2013). A bHLH complex controls embryonic vascular tissue  
564 establishment and indeterminate growth in *Arabidopsis*. *Dev Cell* 24, 426-437.
- 565 De Rybel, B., Adibi, M., Breda, A.S., Wendrich, J.R., Smit, M.E., Novak, O., Yamaguchi, N.,  
566 Yoshida, S., Van Isterdael, G., Palovaara, J., Nijssse, B., Boekschoten, M.V., Hooiveld, G.,  
567 Beekman, T., Wagner, D., Ljung, K., Fleck, C., and Weijers, D. (2014). Plant development.

568 Integration of growth and patterning during vascular tissue formation in Arabidopsis. *Science*  
569 345, 1255215.

570 Du, H., Zhang, L., Liu, L., Tang, X.F., Yang, W.J., Wu, Y.M., Huang, Y.B., and Tang, Y.X.  
571 (2009). Biochemical and molecular characterization of plant MYB transcription factor family.  
572 *Biochemistry (Mosc)* 74, 1-11.

573 Dubos, C., Stracke, R., Grotewold, E., Weisshaar, B., Martin, C., and Lepiniec, L. (2010). MYB  
574 transcription factors in Arabidopsis. *Trends Plant Sci* 15, 573-581.

575 Feller, A., Machemer, K., Braun, E.L., and Grotewold, E. (2011). Evolutionary and comparative  
576 analysis of MYB and bHLH plant transcription factors. *Plant J* 66, 94-116.

577 Forkmann, G., and Martens, S. (2001). Metabolic engineering and applications of flavonoids.  
578 *Curr Opin Biotech* 12, 155-160.

579 Jin, H., and Martin, C. (1999). Multifunctionality and diversity within the plant MYB-gene  
580 family. *Plant Mol Biol* 41, 577-585.

581 Kagale, S., and Rozwadowski, K. (2011). EAR motif-mediated transcriptional repression in  
582 plants: an underlying mechanism for epigenetic regulation of gene expression. *Epigenetics* 6,  
583 141-146.

584 Karabourniotis, G., Liakopoulos, G., Nikolopoulos, D., and Bresta, P. (2020). Protective and  
585 defensive roles of non-glandular trichomes against multiple stresses: structure-function  
586 coordination. *J Forestry Res* 31, 1-12.

587 Karimi, M., Inze, D., and Depicker, A. (2002). GATEWAY vectors for Agrobacterium-mediated  
588 plant transformation. *Trends Plant Sci* 7, 193-195.

589 Katayama, H., Iwamoto, K., Kariya, Y., Asakawa, T., Kan, T., Fukuda, H., and Ohashi-Ito, K.  
590 (2015). A Negative Feedback Loop Controlling bHLH Complexes Is Involved in Vascular Cell  
591 Division and Differentiation in the Root Apical Meristem. *Curr Biol* 25, 3144-3150.

592 Kazan, K. (2006). Negative regulation of defence and stress genes by EAR-motif-containing  
593 repressors. *Trends Plant Sci* 11, 109-112.

594 Kieber, J.J., and Schaller, G.E. (2018). Cytokinin signaling in plant development. *Development*  
595 145.

596 Kirik, V., Simon, M., Huelskamp, M., and Schiefelbein, J. (2004). The ENHANCER OF TRY  
597 AND CPC1 gene acts redundantly with TRIPTYCHON and CAPRICE in trichome and root hair  
598 cell patterning in Arabidopsis. *Dev Biol* 268, 506-513.

599 Krogan, N.T., and Long, J.A. (2009). Why so repressed? Turning off transcription during plant  
600 growth and development. *Current Opinion in Plant Biology* 12, 628-636.

601 Kurakawa, T., Ueda, N., Maekawa, M., Kobayashi, K., Kojima, M., Nagato, Y., Sakakibara, H.,  
602 and Kyojuka, J. (2007). Direct control of shoot meristem activity by a cytokinin-activating  
603 enzyme. *Nature* 445, 652-655.

604 Kuroha, T., Tokunaga, H., Kojima, M., Ueda, N., Ishida, T., Nagawa, S., Fukuda, H., Sugimoto,  
605 K., and Sakakibara, H. (2009). Functional analyses of LONELY GUY cytokinin-activating  
606 enzymes reveal the importance of the direct activation pathway in Arabidopsis. *Plant Cell* 21,  
607 3152-3169.

608 Lee, M.M., and Schiefelbein, J. (1999). WEREWOLF, a MYB-related protein in Arabidopsis, is  
609 a position-dependent regulator of epidermal cell patterning. *Cell* 99, 473-483.

610 Lepiniec, L., Debeaujon, I., Routaboul, J.M., Baudry, A., Pourcel, L., Nesi, N., and Caboche, M.  
611 (2006). Genetics and biochemistry of seed flavonoids. *Annu Rev Plant Biol* 57, 405-430.

612 Liu, J., Osbourn, A., and Ma, P. (2015). MYB Transcription Factors as Regulators of  
613 Phenylpropanoid Metabolism in Plants. *Mol Plant* 8, 689-708.

614 Ma, D., and Constabel, C.P. (2019). MYB Repressors as Regulators of Phenylpropanoid  
615 Metabolism in Plants. *Trends Plant Sci* 24, 275-289.

616 Maes, L., Inze, D., and Goossens, A. (2008). Functional specialization of the TRANSPARENT  
617 TESTA GLABRA1 network allows differential hormonal control of laminal and marginal  
618 trichome initiation in Arabidopsis rosette leaves. *Plant Physiol* 148, 1453-1464.

619 Mehrrens, F., Kranz, H., Bednarek, P., and Weisshaar, B. (2005). The Arabidopsis transcription  
620 factor MYB12 is a flavonol-specific regulator of phenylpropanoid biosynthesis. *Plant Physiol*  
621 138, 1083-1096.

622 Meijering, E., Jacob, M., Sarria, J.C., Steiner, P., Hirling, H., and Unser, M. (2004). Design and  
623 validation of a tool for neurite tracing and analysis in fluorescence microscopy images.  
624 *Cytometry A* 58, 167-176.

625 Micol-Ponce, R., Aguilera, V., and Ponce, M.R. (2014). A genetic screen for suppressors of a  
626 hypomorphic allele of Arabidopsis ARGONAUTE1. *Sci Rep* 4, 5533.

627 Miyashima, S., Roszak, P., Sevilem, I., Toyokura, K., Blob, B., Heo, J.O., Mellor, N., Help-  
628 Rinta-Rahko, H., Otero, S., Smet, W., Boekschoten, M., Hooiveld, G., Hashimoto, K., Smetana,  
629 O., Siligato, R., Wallner, E.S., Mahonen, A.P., Kondo, Y., Melnyk, C.W., Greb, T., Nakajima,

630 K., Sozzani, R., Bishopp, A., De Rybel, B., and Helariutta, Y. (2019). Mobile PEAR  
631 transcription factors integrate positional cues to prime cambial growth. *Nature* 565, 490-494.

632 Nesi, N., Debeaujon, I., Jond, C., Pelletier, G., Caboche, M., and Lepiniec, L. (2000). The TT8  
633 gene encodes a basic helix-loop-helix domain protein required for expression of DFR and BAN  
634 genes in *Arabidopsis* siliques. *Plant Cell* 12, 1863-1878.

635 Ogata, K., Kanei-Ishii, C., Sasaki, M., Hatanaka, H., Nagadoi, A., Enari, M., Nakamura, H.,  
636 Nishimura, Y., Ishii, S., and Sarai, A. (1996). The cavity in the hydrophobic core of Myb DNA-  
637 binding domain is reserved for DNA recognition and trans-activation. *Nat Struct Biol* 3, 178-  
638 187.

639 Ohashi-Ito, K., and Bergmann, D.C. (2007). Regulation of the *Arabidopsis* root vascular initial  
640 population by LONESOME HIGHWAY. *Development* 134, 2959-2968.

641 Ohashi-Ito, K., and Fukuda, H. (2020). Transcriptional networks regulating root vascular  
642 development. *Curr Opin Plant Biol* 57, 118-123.

643 Ohashi-Ito, K., Matsukawa, M., and Fukuda, H. (2013). An atypical bHLH transcription factor  
644 regulates early xylem development downstream of auxin. *Plant Cell Physiol* 54, 398-405.

645 Ohashi-Ito, K., Saegusa, M., Iwamoto, K., Oda, Y., Katayama, H., Kojima, M., Sakakibara, H.,  
646 and Fukuda, H. (2014). A bHLH complex activates vascular cell division via cytokinin action in  
647 root apical meristem. *Curr Biol* 24, 2053-2058.

648 Oppenheimer, D.G., Herman, P.L., Sivakumaran, S., Esch, J., and Marks, M.D. (1991). A myb  
649 gene required for leaf trichome differentiation in *Arabidopsis* is expressed in stipules. *Cell* 67,  
650 483-493.

651 Otero S., S.I., Roszak P., Lu Y., Di Vittori V., Bourdon M., Kalmbach L., Blob B., Heo J.,  
652 Peruzzo F., Laux T., Fernie A., Tavares H., Helariutta Y. (2021). An *Arabidopsis* root phloem  
653 pole cell atlas reveals PINEAPPLE genes as transitioners to autotrophy (BioRxiv). doi:  
654 <https://doi.org/10.1101/2021.08.31.458411>

655 Parizot, B., Laplaze, L., Ricaud, L., Boucheron-Dubuisson, E., Bayle, V., Bonke, M., De Smet,  
656 I., Poethig, S.R., Helariutta, Y., Haseloff, J., Chriqui, D., Beeckman, T., and Nussaume, L.  
657 (2008). Diarch symmetry of the vascular bundle in *Arabidopsis* root encompasses the pericycle  
658 and is reflected in distich lateral root initiation. *Plant Physiol* 146, 140-148.

659 Ramsay, N.A., and Glover, B.J. (2005). MYB-bHLH-WD40 protein complex and the evolution  
660 of cellular diversity. *Trends Plant Sci* 10, 63-70.

661 Schindelin, J., Arganda-Carreras, I., Frise, E., Kaynig, V., Longair, M., Pietzsch, T., Preibisch,  
662 S., Rueden, C., Saalfeld, S., Schmid, B., Tinevez, J.Y., White, D.J., Hartenstein, V., Eliceiri, K.,  
663 Tomancak, P., and Cardona, A. (2012). Fiji: an open-source platform for biological-image  
664 analysis. *Nat Methods* 9, 676-682.

665 Schneeberger, K., Ossowski, S., Lanz, C., Juul, T., Petersen, A.H., Nielsen, K.L., Jorgensen,  
666 J.E., Weigel, D., and Andersen, S.U. (2009). SHOREmap: simultaneous mapping and mutation  
667 identification by deep sequencing. *Nat Methods* 6, 550-551.

668 Smet, W., Seville, I., de Luis Balaguer, M.A., Wybouw, B., Mor, E., Miyashima, S., Blob, B.,  
669 Roszak, P., Jacobs, T.B., Boekschoten, M., Hooiveld, G., Sozzani, R., Helariutta, Y., and De  
670 Rybel, B. (2019). DOF2.1 Controls Cytokinin-Dependent Vascular Cell Proliferation  
671 Downstream of TMO5/LHW. *Curr Biol* 29, 520-529 e526.

672 Song, S.K., Kwak, S.H., Chang, S.C., Schiefelbein, J., and Lee, M.M. (2015). WEREWOLF and  
673 ENHANCER of GLABRA3 are interdependent regulators of the spatial expression pattern of  
674 GLABRA2 in Arabidopsis. *Biochem Biophys Res Commun* 467, 94-100.

675 Stracke, R., Werber, M., and Weisshaar, B. (2001). The R2R3-MYB gene family in Arabidopsis  
676 thaliana. *Curr Opin Plant Biol* 4, 447-456.

677 Stracke, R., Turgut-Kara, N., and Weisshaar, B. (2017). The AtMYB12 activation domain maps  
678 to a short C-terminal region of the transcription factor. *Z Naturforsch C* 72, 251-257.

679 Stracke, R., Ishihara, H., Huep, G., Barsch, A., Mehrtens, F., Niehaus, K., and Weisshaar, B.  
680 (2007). Differential regulation of closely related R2R3-MYB transcription factors controls  
681 flavonol accumulation in different parts of the Arabidopsis thaliana seedling. *Plant J* 50, 660-  
682 677.

683 Stracke, R., Jahns, O., Keck, M., Tohge, T., Niehaus, K., Fernie, A.R., and Weisshaar, B. (2010).  
684 Analysis of PRODUCTION OF FLAVONOL GLYCOSIDES-dependent flavonol glycoside  
685 accumulation in Arabidopsis thaliana plants reveals MYB11-, MYB12- and MYB111-  
686 independent flavonol glycoside accumulation. *New Phytol* 188, 985-1000.

687 Tominaga-Wada, R., Kurata, T., and Wada, T. (2017). Localization of ENHANCER OF TRY  
688 AND CPC1 protein in Arabidopsis root epidermis. *J Plant Physiol* 214, 48-52.

689 Truernit, E., Bauby, H., Dubreucq, B., Grandjean, O., Runions, J., Barthelemy, J., and Palauqui,  
690 J.C. (2008). High-resolution whole-mount imaging of three-dimensional tissue organization and

691 gene expression enables the study of Phloem development and structure in Arabidopsis. The  
692 Plant cell 20, 1494-1503.

693 Vera-Sirera, F., De Rybel, B., Urbez, C., Kouklas, E., Pesquera, M., Alvarez-Mahecha, J.C.,  
694 Minguet, E.G., Tuominen, H., Carbonell, J., Borst, J.W., Weijers, D., and Blazquez, M.A.  
695 (2015). A bHLH-Based Feedback Loop Restricts Vascular Cell Proliferation in Plants. Dev Cell  
696 35, 432-443.

697 Wada, T., Tachibana, T., Shimura, Y., and Okada, K. (1997). Epidermal cell differentiation in  
698 Arabidopsis determined by a Myb homolog, CPC. Science 277, 1113-1116.

699 Wang, F., Kong, W., Wong, G., Fu, L., Peng, R., Li, Z., and Yao, Q. (2016). AtMYB12 regulates  
700 flavonoids accumulation and abiotic stress tolerance in transgenic Arabidopsis thaliana. Mol  
701 Genet Genomics 291, 1545-1559.

702 Wang, S., and Chen, J.G. (2014). Regulation of cell fate determination by single-repeat R3 MYB  
703 transcription factors in Arabidopsis. Front Plant Sci 5, 133.

704 Wang, S., Hubbard, L., Chang, Y., Guo, J., Schiefelbein, J., and Chen, J.G. (2008).  
705 Comprehensive analysis of single-repeat R3 MYB proteins in epidermal cell patterning and their  
706 transcriptional regulation in Arabidopsis. BMC Plant Biol 8, 81.

707 Weijers, D., Franke-van Dijk, M., Vencken, R.J., Quint, A., Hooykaas, P., and Offringa, R.  
708 (2001). An Arabidopsis Minute-like phenotype caused by a semi-dominant mutation in a  
709 RIBOSOMAL PROTEIN S5 gene. Development 128, 4289-4299.

710 Wendrich, J.R., Yang, B., Vandamme, N., Verstaen, K., Smet, W., Van de Velde, C., Minne, M.,  
711 Wybouw, B., Mor, E., Arents, H.E., Nolf, J., Van Duyse, J., Van Isterdael, G., Maere, S., Saeys,  
712 Y., and De Rybel, B. (2020). Vascular transcription factors guide plant epidermal responses to  
713 limiting phosphate conditions. Science 370.

714 Winkel-Shirley, B. (2001). Flavonoid biosynthesis. A colorful model for genetics, biochemistry,  
715 cell biology, and biotechnology. Plant Physiol 126, 485-493.

716 Winkler, J., Mylle, E., De Meyer, A., Pavie, B., Merchie, J., Grones, P., and Van Damme, D.L.  
717 (2021). Visualizing protein-protein interactions in plants by rapamycin-dependent delocalization.  
718 Plant Cell 33, 1101-1117.

719 Wybouw, B., and De Rybel, B. (2019). Cytokinin - A Developing Story. Trends Plant Sci 24,  
720 177-185.



721 Xu, W., Dubos, C., and Lepiniec, L. (2015). Transcriptional control of flavonoid biosynthesis by  
722 MYB-bHLH-WDR complexes. *Trends Plant Sci* 20, 176-185.

723 Xu, W., Grain, D., Le Gourrierc, J., Harscoet, E., Berger, A., Jauvion, V., Scagnelli, A., Berger,  
724 N., Bidzinski, P., Kelemen, Z., Salsac, F., Baudry, A., Routaboul, J.M., Lepiniec, L., and Dubos,  
725 C. (2013). Regulation of flavonoid biosynthesis involves an unexpected complex transcriptional  
726 regulation of TT8 expression, in *Arabidopsis*. *New Phytol* 198, 59-70.

727 Yang, B., Minne, M., Brunoni, F., Plackova, L., Petrik, I., Sun, Y., Nolf, J., Smet, W., Verstaen,  
728 K., Wendrich, J.R., Eekhout, T., Hoyerova, K., Van Isterdael, G., Haustraete, J., Bishopp, A.,  
729 Farcot, E., Novak, O., Saeys, Y., and De Rybel, B. (2021). Non-cell autonomous and  
730 spatiotemporal signalling from a tissue organizer orchestrates root vascular development. *Nat*  
731 *Plants* 7, 1485-1494.

732 Yperman, K., Wang, J., Eekhout, D., Winkler, J., Vu, L.D., Vandorpe, M., Groner, P., Mylle,  
733 E., Kraus, M., Merceron, R., Nolf, J., Mor, E., De Bruyn, P., Loris, R., Potocky, M., Savvides,  
734 S.N., De Rybel, B., De Jaeger, G., Van Damme, D., and Pleskot, R. (2021). Molecular  
735 architecture of the endocytic TPLATE complex. *Sci Adv* 7.

736 Zhao, M., Morohashi, K., Hatlestad, G., Grotewold, E., and Lloyd, A. (2008). The TTG1-bHLH-  
737 MYB complex controls trichome cell fate and patterning through direct targeting of regulatory  
738 loci. *Development* 135, 1991-1999.

739 Zimmermann, I.M., Heim, M.A., Weisshaar, B., and Uhrig, J.F. (2004). Comprehensive  
740 identification of *Arabidopsis thaliana* MYB transcription factors interacting with R/B-like BHLH  
741 proteins. *Plant J* 40, 22-34.

742

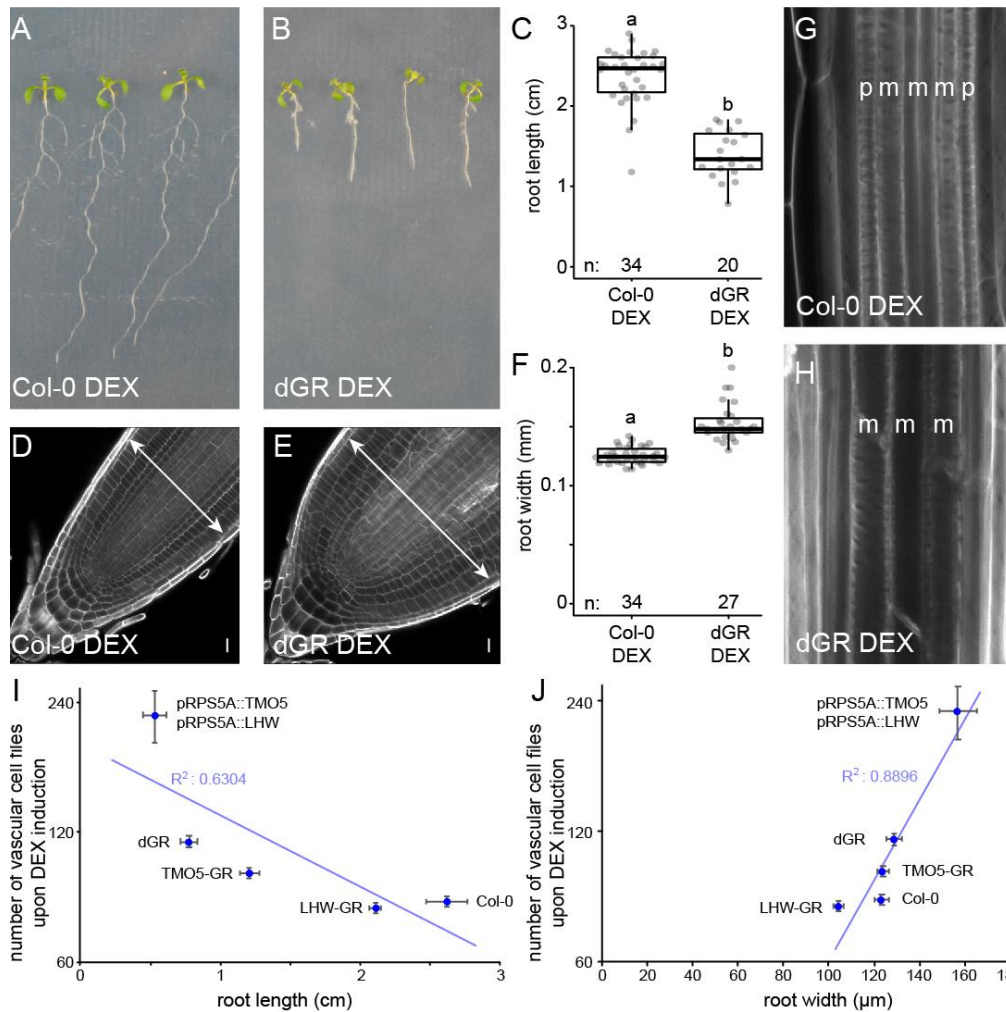

743

744 **Figure 1. Root phenotype of Col-0 and the dGR line on induced (DEX) media**

745 (A-B) 1-week-old Col-0 (A) and dGR (B) plants grown on 10 μM DEX. (C) Boxplot of root  
 746 length of Col-0 and dGR plants grown for 5 days on 10 μM DEX. (D-E) Col-0 (D) and dGR (E)  
 747 root tips grown on 10 μM DEX. Arrows are highlighting root meristem width. (F) Boxplot of  
 748 root width of Col-0 and dGR plants grown on 10 μM DEX. (G-H) The vascular differentiation  
 749 phenotype of Col-0 (G) and dGR (H) plants grown on 10 μM DEX. The p and m indicate  
 750 protoxylem and metaxylem strands respectively. Root width of Col-0 and dGR plants grown for  
 751 5 days on 10 μM DEX (n ≥ 20). (I-J) 1-week old seedlings grown on 10 μM DEX (n ≥ 10), were  
 752 used to plot the number of total cell files in the root meristem against the root length (I) or root  
 753 width (J). Error bars indicate standard error. Scale bars in D-E indicate 10 μm. Lower-case  
 754 letters in C, F indicate significantly different groups as determined by one-way ANOVA with  
 755 post-hoc Tukey HSD testing. Black lines indicates mean values and grey boxes indicate data  
 756 ranges. n marks the number of datapoints for each sample.

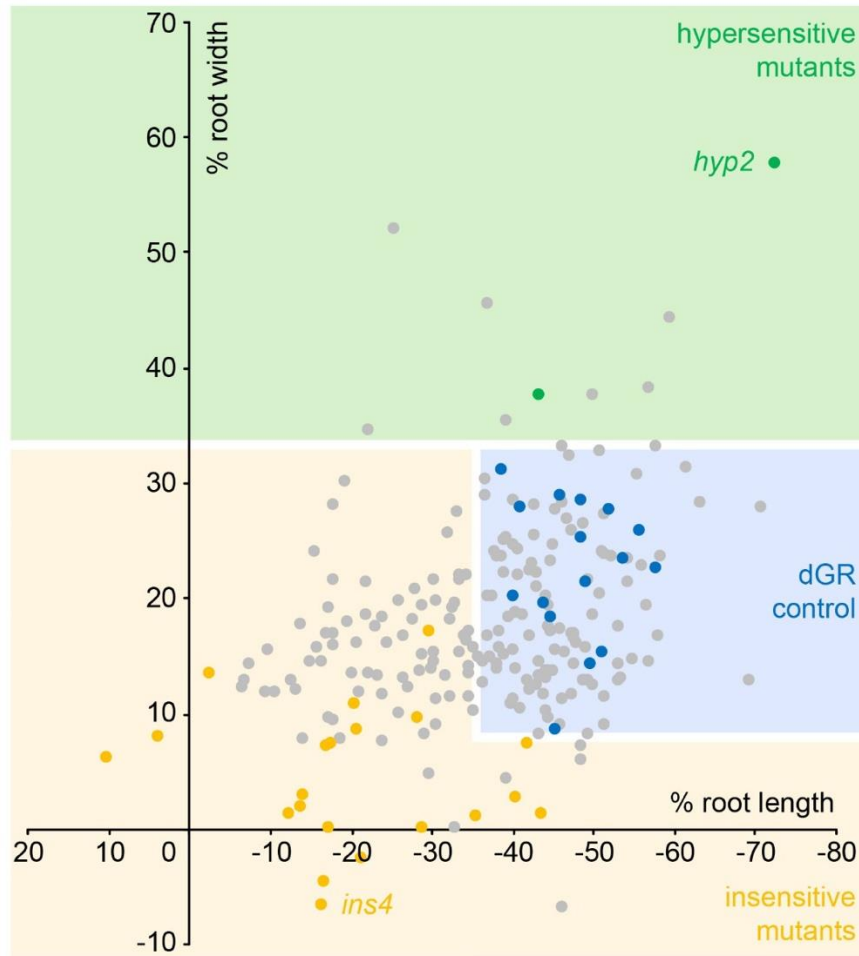

757

758 **Figure 2. Overview of obtained EMS mutants**

759 A total overview of all 260 primary selected EMS mutants is plotted for their sensitivity of root  
760 length changes relative to dGR against the sensitivity of root width changes relative to dGR.  
761 Data from the EMS screening was used. Dots in the blue box represent EMS mutants behaving  
762 similar to parental dGR control and dots in the yellow box represent mutants that behave  
763 insensitive to dGR response compared to the dGR parental line, while in the green box mutants  
764 behave hypersensitive to dGR induction. Yellow and green dots represent the 22 selected EMS  
765 mutants, the yellow dots represent the *ins* mutants and green dots the *hyp* mutants. Grey dots  
766 represent other EMS mutants selected from the primary screen and blue dots represent non-  
767 mutagenized parental dGR. For each data point the average was used from 10 biological repeats.

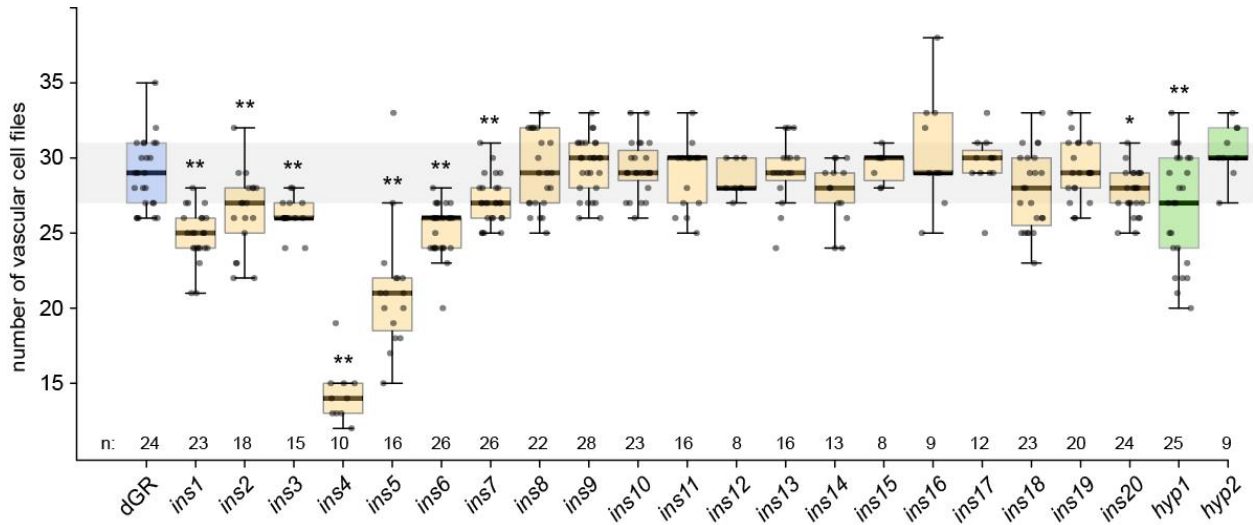

768

769 **Figure 3. Overview vascular cell files phenotype in candidate mutants**

770 Counts of vascular cell files in the root meristem of 1-week-old dGR (blue), *ins* (yellow) and *hyp*  
771 (green) seedlings. n marks the number of datapoints for each sample. Student's T-test was  
772 performed to evaluate statistical differences between a mutant's and dGR vascular cell file  
773 numbers. Student T-test significances asterisks: \* = p-value < 0.05; \*\* = p-value < 0.01.

774

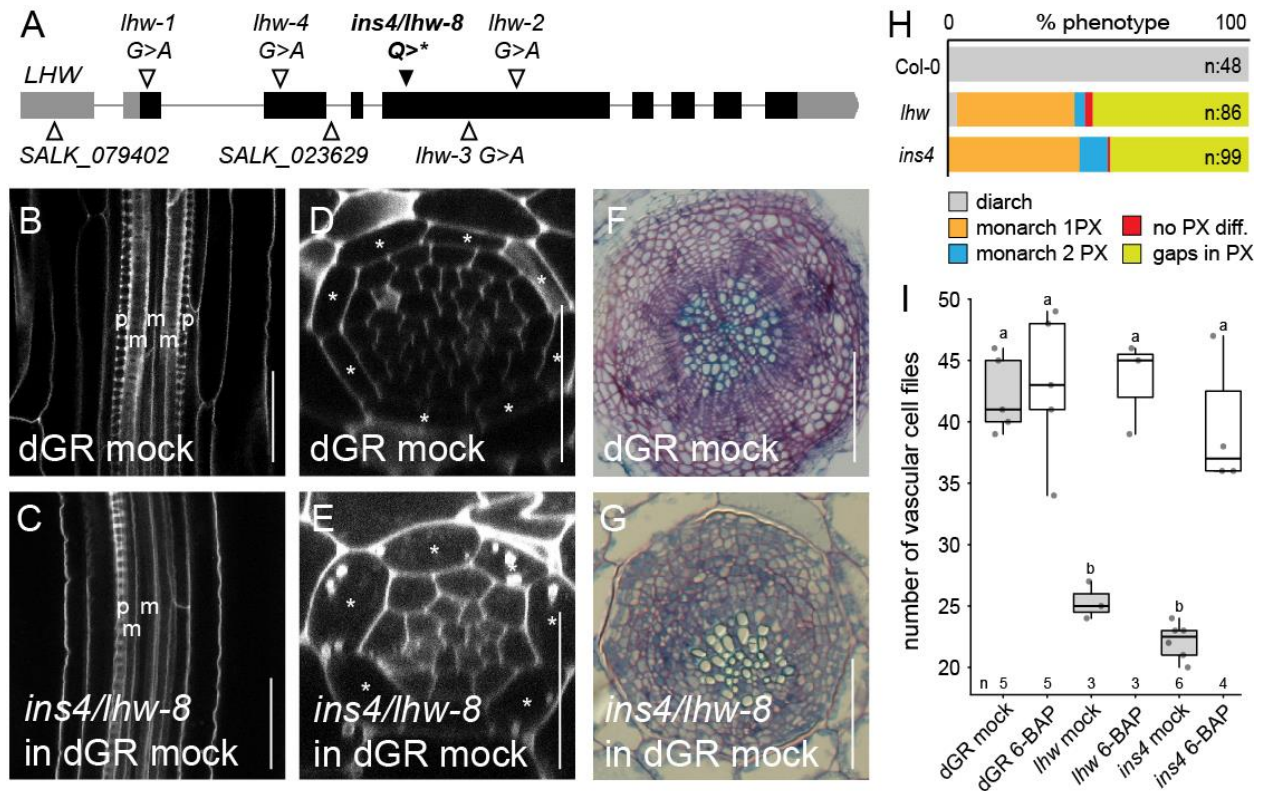

775

776 **Figure 4. The insensitive mutant *ins4* is a novel *lhw* allele**

777 (A) Alleles of *lhw* mutants with *ins4/lhw-8* having a point mutation, resulting in a premature stop  
778 codon in exon (black bar) 4 of *LHW*. (B-C) Longitudinal view of the root vascular tissue shown  
779 for Col-0 (B) and *ins4/lhw-8* (C). (D-E) Optical cross-section through the root meristem of Col-0  
780 (D) and *ins4/lhw-8* (E) show smaller vascular cylinder for *ins4/lhw-8*. (F-G) Secondary growth  
781 phenotype can be observed in sections of Col-0 (F) and *ins4/lhw-8* (G) through the hypocotyl of  
782 3-week-old seedlings. Scale bars in B-E are 25  $\mu$ m and in F-G 100  $\mu$ m. (H) The frequency of  
783 xylem differentiation (diff.) phenotype plotted for Col-0, *lhw* and *ins4*. The asterisks mark the  
784 endodermis cells in D-E, 'p' an 'm' represent protoxylem and metaxylem cell files in B-C. (I)  
785 The number of vascular cell files of 1-week-old seedlings treated with cytokinin (6-BAP).  
786 Lower-case letters indicate significantly different groups as determined by pairwise comparison  
787 in a two-way ANOVA. Black lines indicates mean values and grey/white boxes indicate data  
788 ranges. n marks the number of datapoints for each sample.

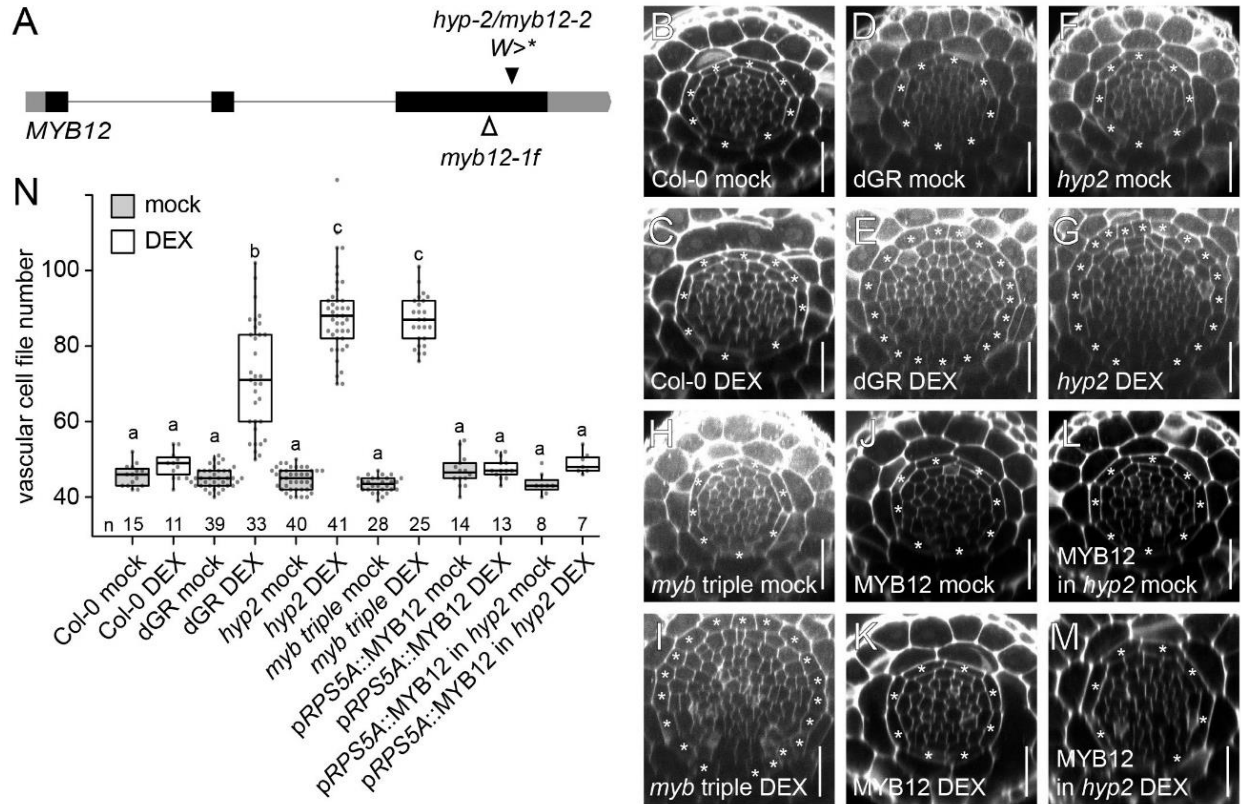

789

790 **Figure 5. The *hyp2* is hypersensitive to dGR response and MYB12 acts as a repressor for**  
 791 **TMO5/LHW activity**

792 (A) MYB12 gene marked with known *myb12-1f* transposon insertion site and *hyp2/myb12-2*  
 793 point mutation site, which results in premature stop codon. (B-M) Representative root meristem  
 794 cross-sections of Col-0 on mock (B), Col-0 on DEX (C), dGR on mock (D), dGR on DEX (E),  
 795 *hyp2/myb12-2* on mock (F), *hyp2/myb12-2* on DEX (G), *myb11 myb12-1f myb111* triple mutant  
 796 (referred to as *myb triple*) on mock (H), *myb triple* on DEX (I), pRPS5A::MYB12 on mock (J),  
 797 pRPS5A::MYB12 on DEX (K), pRPS5A::MYB12 (in *myb12-2*) line on mock (L) and on DEX  
 798 (M). The asterisks mark the endodermis cells and counted vascular cell file number are within  
 799 this cell type. Scale bars are 25  $\mu$ m. (N) Boxplot plotting the vascular cell file number. Lower-  
 800 case letters indicate significantly different groups as determined by pairwise comparison in a  
 801 two-way ANOVA. Black lines indicates mean values and grey/white boxes indicate data ranges.  
 802 n marks the number of datapoints for each sample.

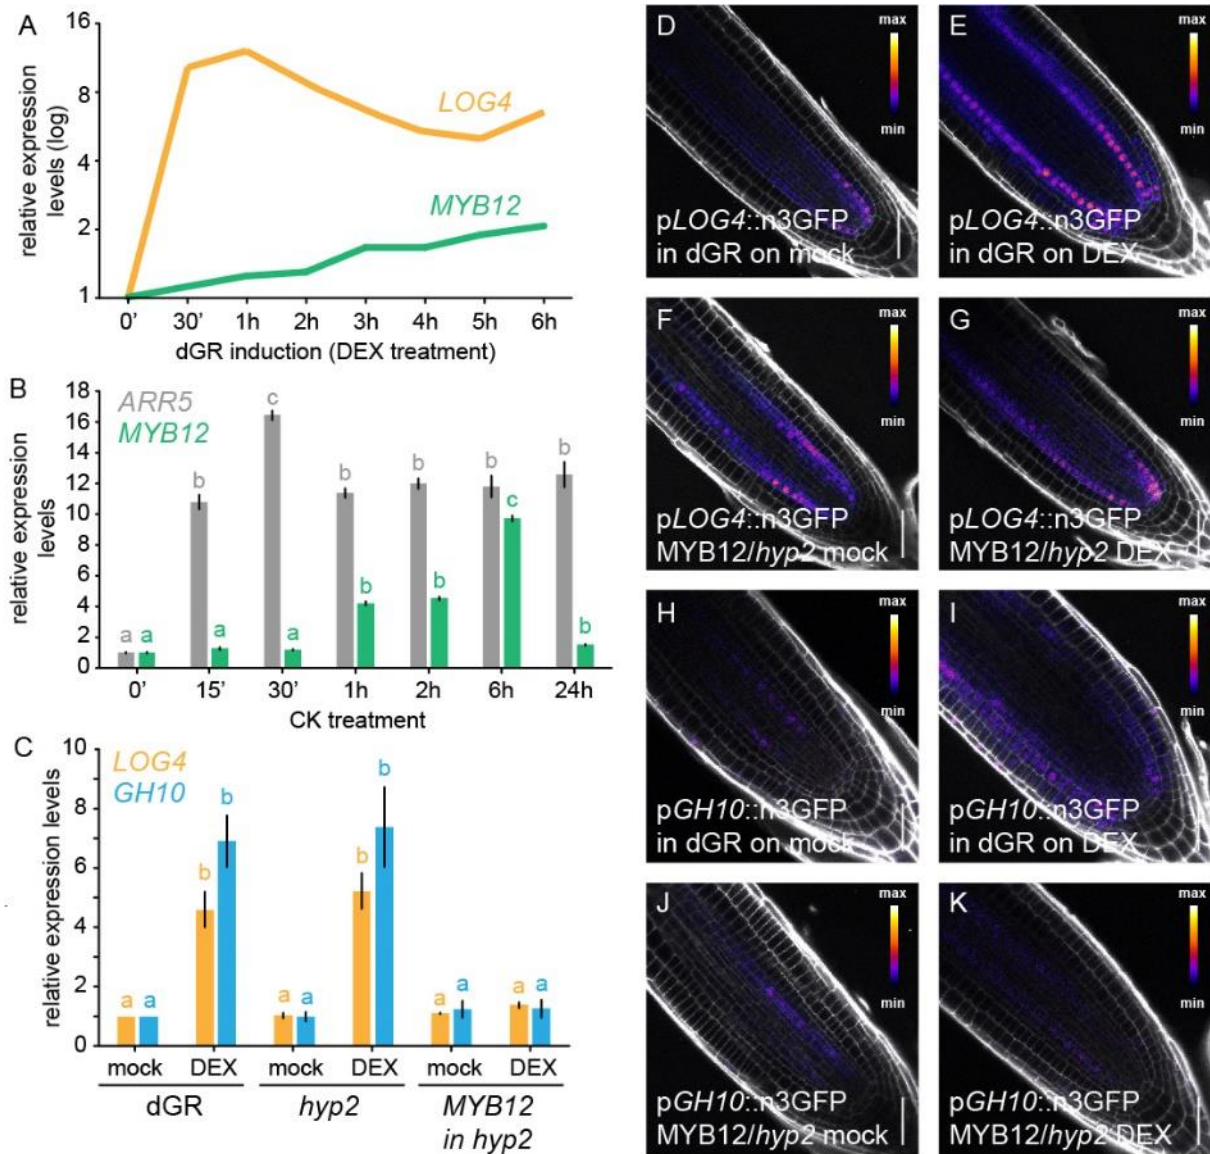

803

804 **Figure 6. MYB12, downstream of TMO5/LHW-mediated CK production, represses**  
805 **TMO5/LHW target gene expression**

806 (A) Relative expression levels *LOG4* and *MYB12* genes over different DEX treatment durations  
807 on dGR line derived from microarray data described in Smet et al 2019 (Smet et al., 2019), with  
808 0h DEX expression levels set to 1. (B) Relative expression levels of the CK-inducible A-type  
809 *ARR5* and *MYB12* in a time course experiment following cytokinin treatment. (C) Relative  
810 expression of *LOG4* and *GH10* in 5-days-old seedlings of dGR, *hyp2/myb12-2* (dGR) and  
811 pRPS5A::MYB12 in *hyp2/myb12-2* (dGR) where TMO5/LHW activity was induced for 2h on  
812 mock or DEX. (D-G) Expression of pLOG4::n3GFP in F1 5-days-old seedlings in dGR  
813 background (D-E) and pRPS5A::MYB12 in *hyp2/myb12-2* (dGR) (F-G) background after 24h on

814 mock (**D,F**) or DEX (**E,G**). Expression of p*GH10*::n3GFP in F1 5-days-old seedlings in dGR  
815 background (**H-I**) and p*RPS5A*::MYB12 in *hyp2/myb12-2* (dGR) background (**J-K**) after 24h on  
816 mock (**H,J**) or DEX (**I,K**). Scale bars are 50  $\mu$ m. Lower-case letters in B, C indicate significantly  
817 different groups per gene as determined by one-way ANOVA with post-hoc Tukey HSD testing.  
818 Black lines indicates mean values and grey boxes indicate data ranges. n marks the number of  
819 datapoints for each sample. Error bars are standard errors.  
820



821

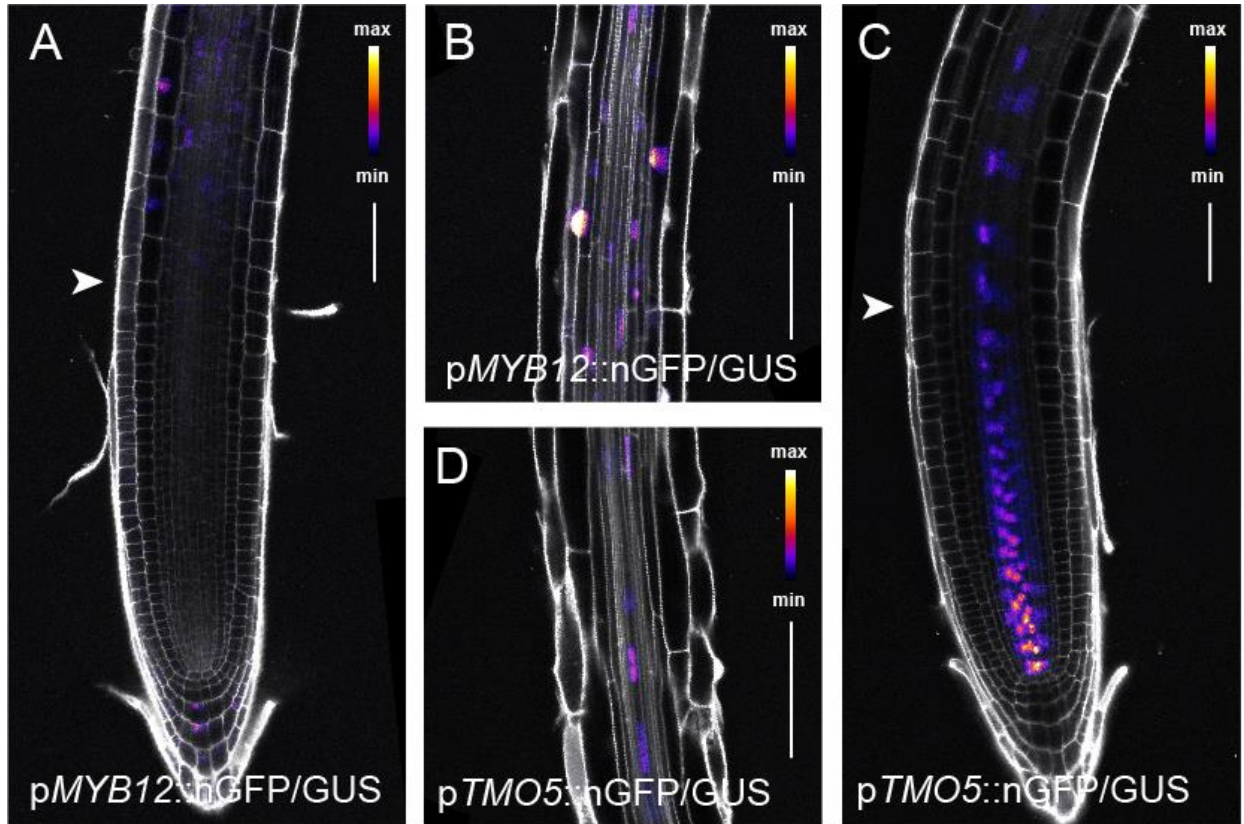

822

823 **Figure 7 MYB12 and TMO5 have overlapping expression patterns**

824 (A-B) Expression pattern of 1-week-old pMYB12::nGFP/GUS in root meristem (A) and root

825 elongation zone (B). (C-D) Expression pattern of 1-week-old pTMO5::nGFP/GUS in meristem

826 (C) and root elongation zone (D). Arrowheads indicate start of root elongation zone. Scale bars

827 are 50 μm (A,C) and 100 μm (B,D).

828

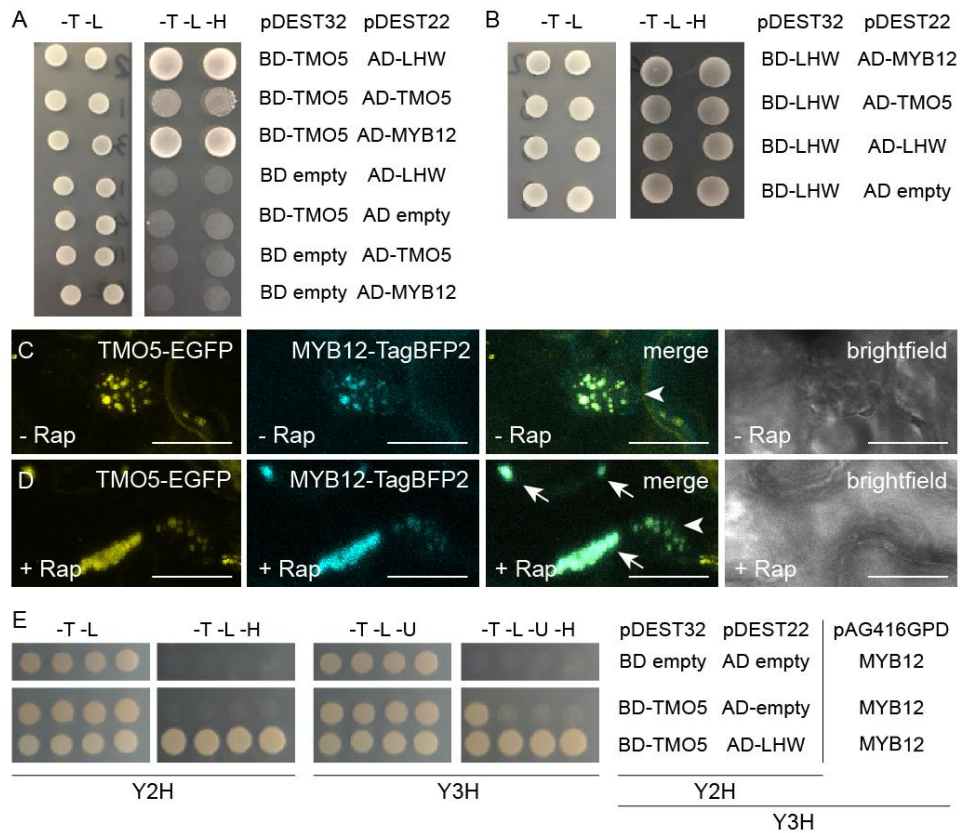

829

830 **Figure 8. MYB12 binds to TMO5 in yeast and tobacco leaves.**

831 (A-B) Yeast-two-hybrid assay with pDEST22 (prey) or pDEST32 (bait) constructs containing  
 832 fusion proteins of the MYB12, TMO5 and LHW coupled to respectively, the activator (AD) or  
 833 binding domain (BD). The empty pDEST22 or empty pDEST32 plasmids were used to check for  
 834 auto-activation. Transformed yeast grown on the selective -Trp/-Leu (-T -L) medium and  
 835 interaction verifying -Trp/-Leu/-His (-T -L -H) medium. (C-D) Knock-sideways with TMO5-  
 836 EGFP-FKGP, MYB12-TagBFP2 and Mito-FRB in absence (C) or presence of rapamycin (D).  
 837 Arrows indicate the aggregated mitochondria and arrowheads indicate the nucleus. (n ≥10) Scale  
 838 bars are 20 μm. (E) Left hand side images Y2H yeast pairs of pDEST32 and pDEST22  
 839 constructs selective -Trp/-Leu (-T -L) medium and interaction verifying -Trp/-Leu/-His (-T -L -  
 840 H) medium. MYB12 in pAG416GPD with marker gene URA3 was introduced by mating. Right  
 841 images Y3H yeast transformants with pDEST32 and pDEST22 constructs and pAG416GPD on  
 842 selective -Trp/-Leu/-Ura (-T -L -U) medium and interaction verifying selective -Trp/-Leu/-Ura/-  
 843 His (-T -L -U -H) medium.

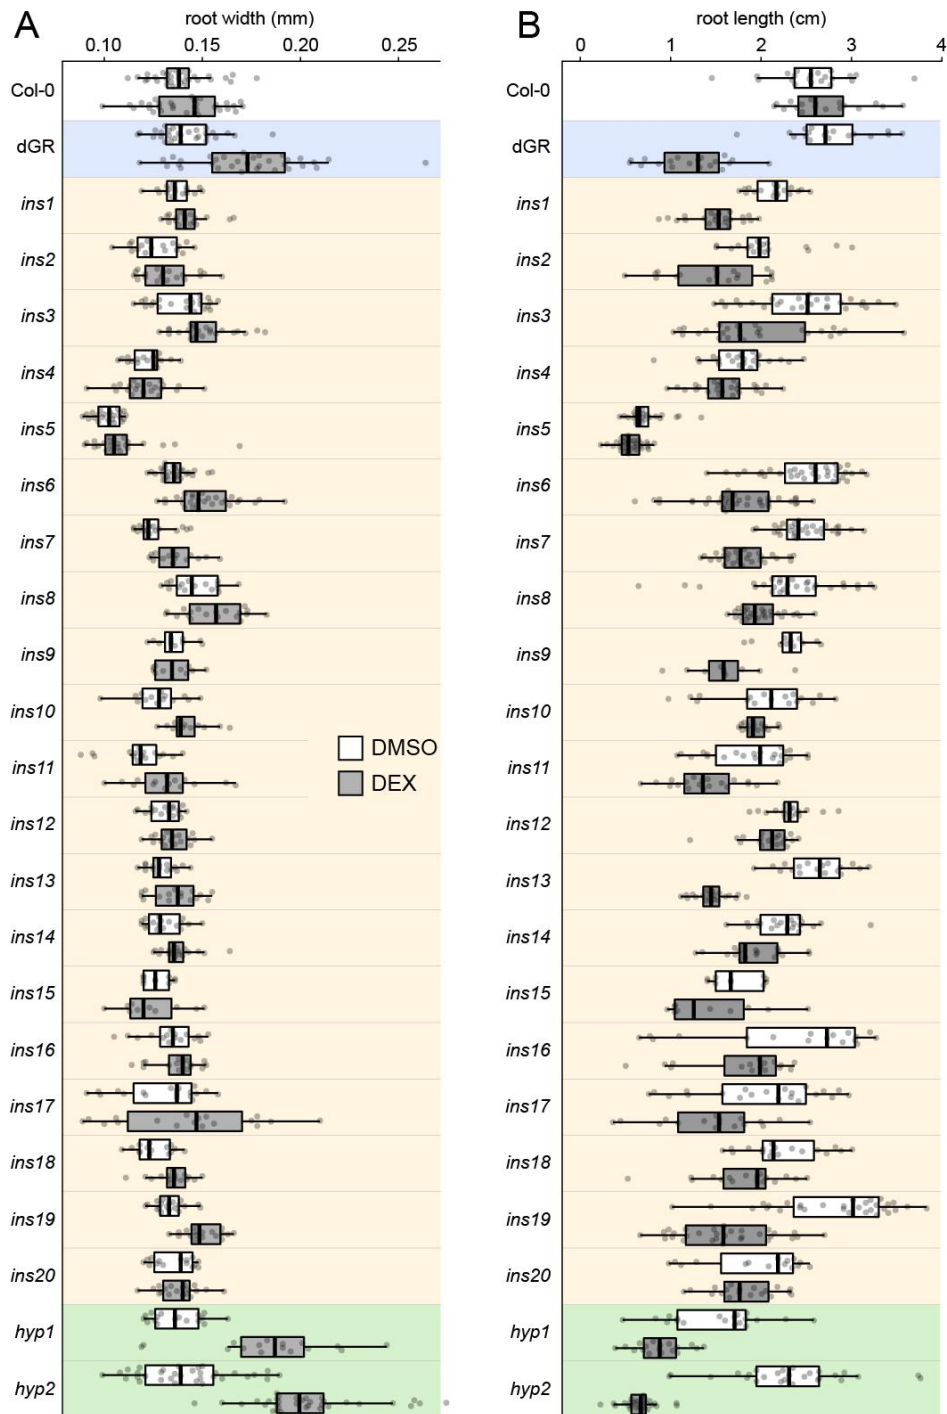

844

845

846 **Figure S1. Root widths and lengths of selected EMS mutants.** (A-B) Mutants seedlings were

847 grown on mock or 10  $\mu$ M DEX for 1-week, were analysed for width (A) and length (B). Samples

848 were compared pairwise in a two-way ANOVA and post hoc comparison with results shown in

849 **Table S1.**

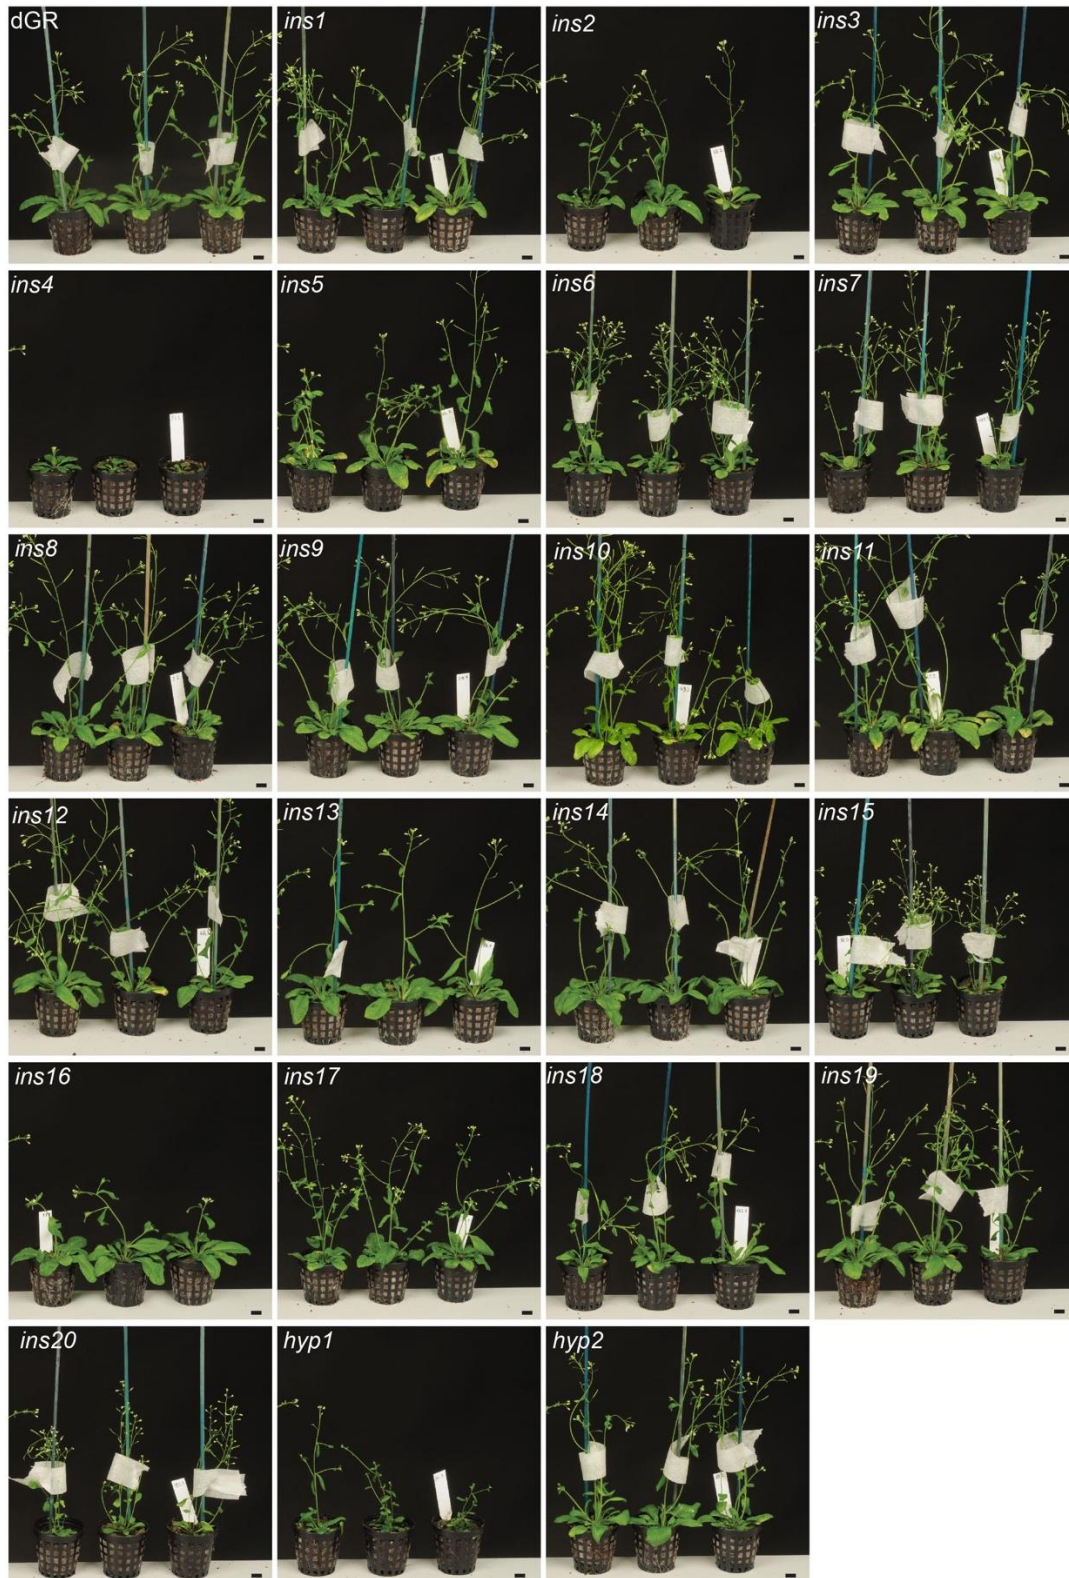

850

851 **Figure S2. Whole plant phenotype of selected mutants.** Overview of selected EMS mutants at  
852 5-week-old. Scale bars are 1 cm.

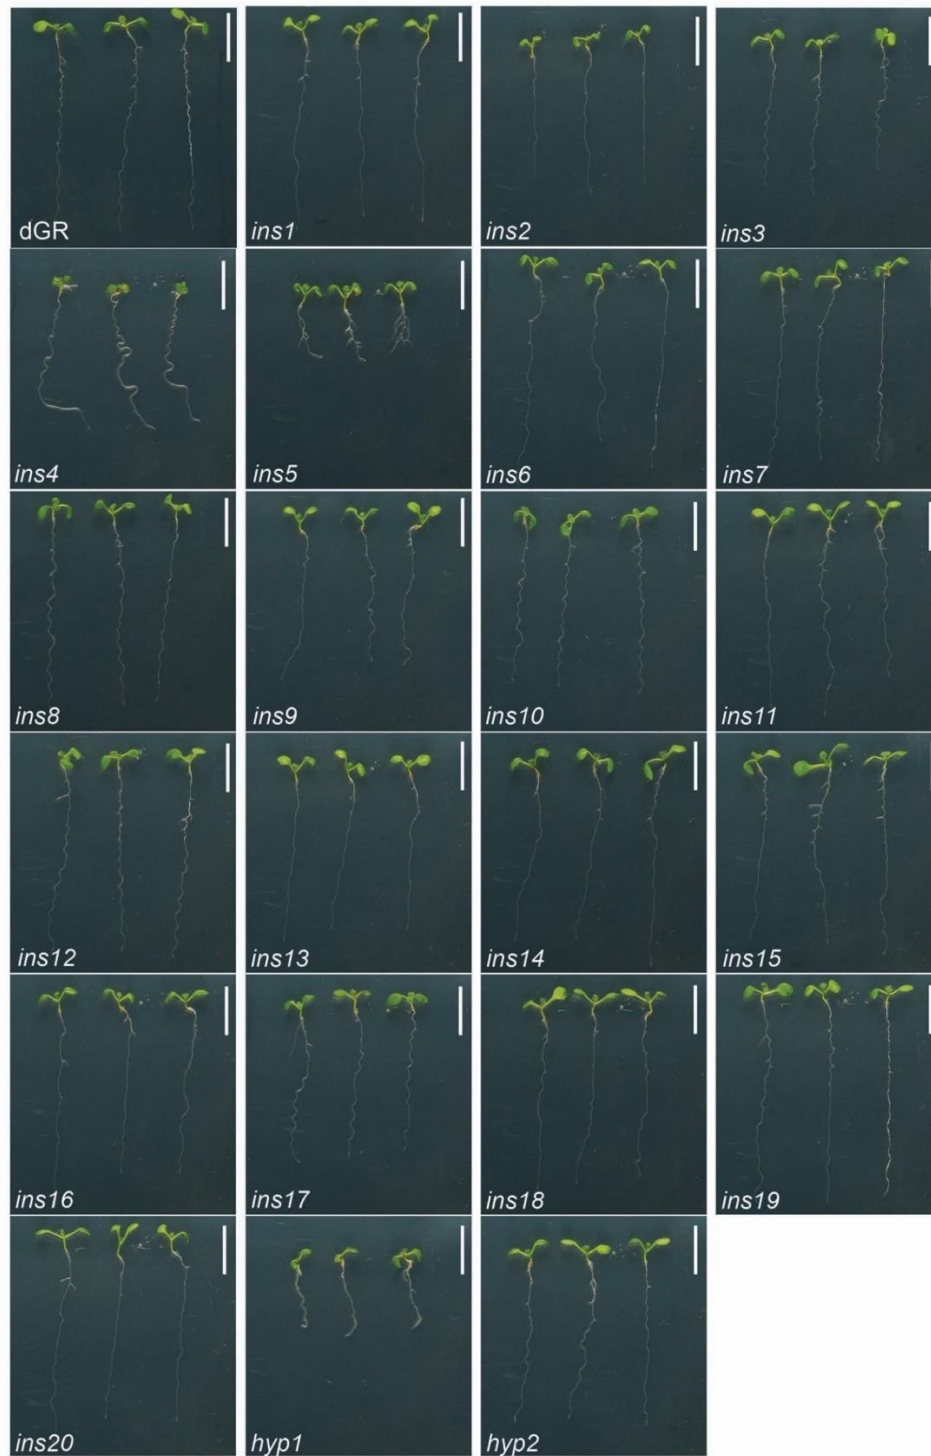

853

854 **Figure S3. Whole seedling phenotype of selected mutants** Overview of selected EMS mutants

855 at the 1-week-old seedling stage grown on  $\frac{1}{2}$  MS medium. Scale bars are 1 cm.

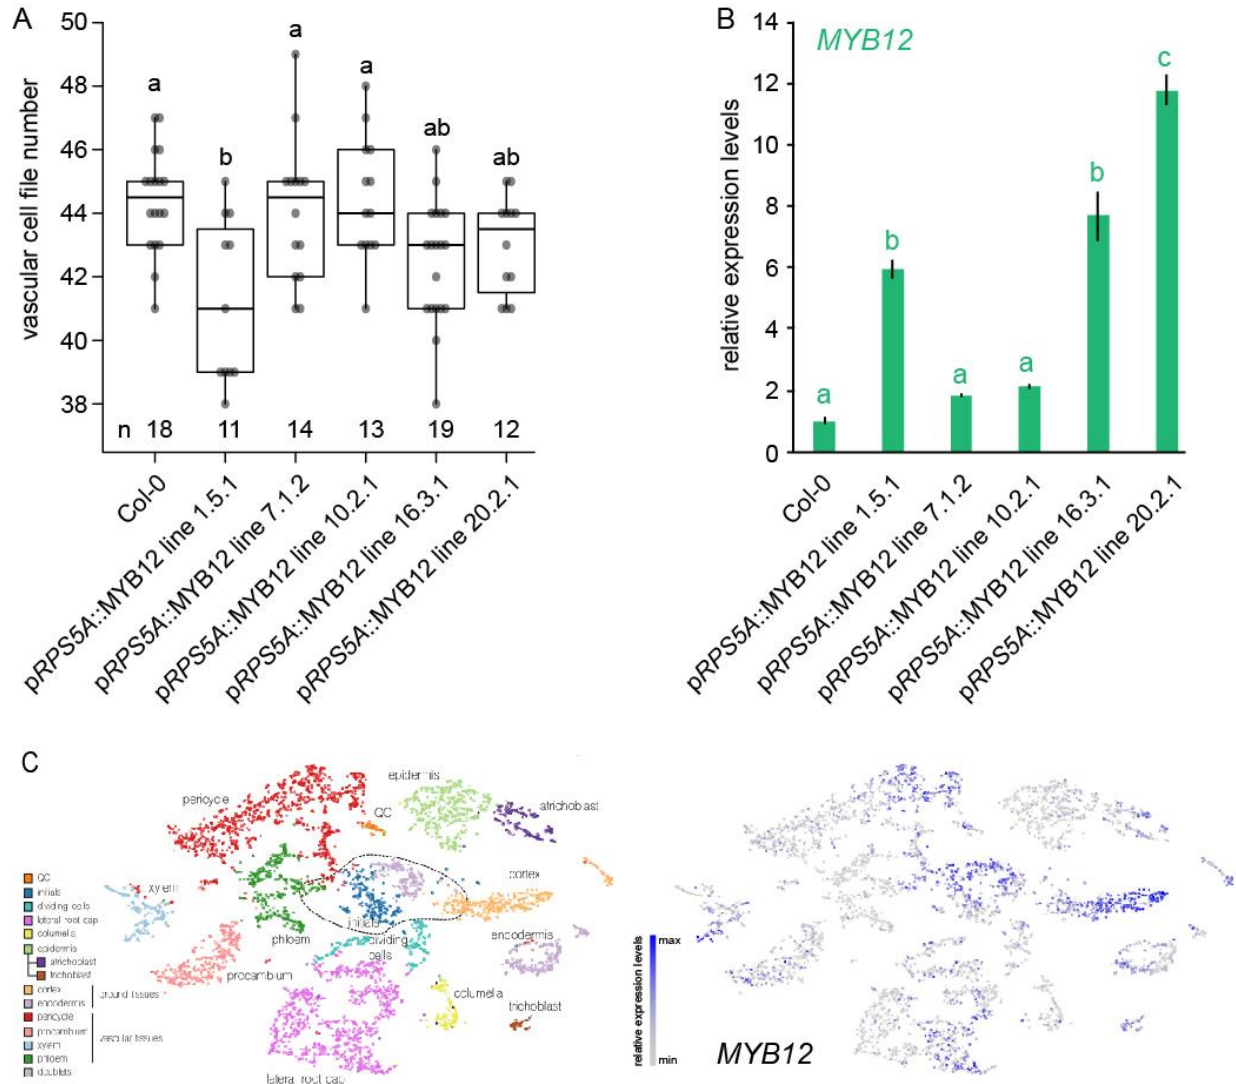

856

857 **Figure S4. Vascular cell file number in pRPS5A::MYB lines and MYB12 expression levels.**

858 (A) Vascular cell number in the root meristem of 1-week-old pRPS5A::MYB12 in Col-0

859 seedlings grown on 1/2 MS. (B) Relative expression levels of MYB12 in pRPS5A::MYB12 lines.

860 Lower-case letters in A and B indicate significantly different groups as determined by one-way

861 ANOVA with post-hoc Tukey HSD testing and Tukey-Kramer Grouping. Black lines indicates

862 mean values and white boxes indicate data ranges. n marks the number of datapoints for each

863 sample. (C) Predicted expression of MYB12 according to a previously published single cell atlas

864 of the Arabidopsis root meristem (Wendrich et al., 2020).

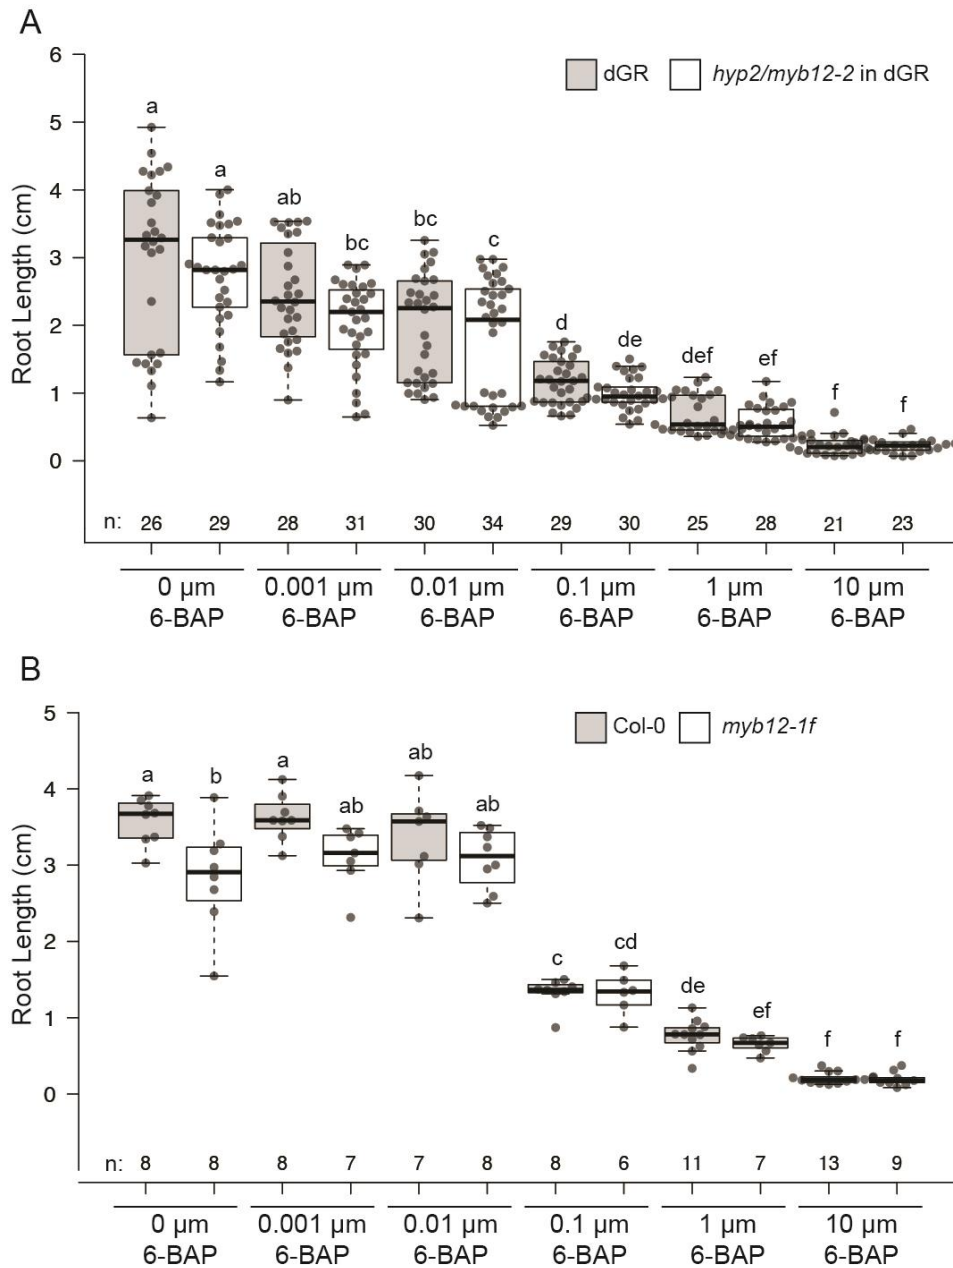

865

866 **Figure S5. Influence of increasing concentrations of cytokinin on root length.** (A-B) Root  
867 length of 1-week-old seedlings of the indicated genotype grown on  $\frac{1}{2}$  MS supplemented with the  
868 indicated concentration of cytokinin (6-BAP) from germination onwards. dGR and Col-0 act as  
869 controls in panes A and B, respectively. Lower-case letters in A and B indicate significantly  
870 different groups as determined by one-way ANOVA with post-hoc Tukey HSD testing and  
871 Tukey-Kramer Grouping. Black lines indicates mean values and white/grey boxes indicate data  
872 ranges. n marks the number of datapoints for each sample.

## Parsed Citations

Appelhagen, I., Jahns, O., Bartelniewoehner, L., Sagasser, M., Weisshaar, B., and Stracke, R. (2011). Leucoanthocyanidin Dioxygenase in *Arabidopsis thaliana*: characterization of mutant alleles and regulation by MYB-BHLH-TTG1 transcription factor complexes. *Gene* 484, 61-68.

Google Scholar: [Author Only](#) [Title Only](#) [Author and Title](#)

Arents, H.E., Eswaran, G., Glanc, M., Mahonen, A.P., and De Rybel, B. (2022). Means to Quantify Vascular Cell File Numbers in Different Tissues. *Methods Mol Biol* 2382, 155-179.

Google Scholar: [Author Only](#) [Title Only](#) [Author and Title](#)

Belshaw, P.J., Ho, S.N., Crabtree, G.R., and Schreiber, S.L. (1996). Controlling protein association and subcellular localization with a synthetic ligand that induces heterodimerization of proteins. *Proc Natl Acad Sci U S A* 93, 4604-4607.

Google Scholar: [Author Only](#) [Title Only](#) [Author and Title](#)

Brenner, W.G., and Schumling, T. (2012). Transcript profiling of cytokinin action in *Arabidopsis* roots and shoots discovers largely similar but also organ-specific responses. *BMC Plant Biol* 12, 112.

Google Scholar: [Author Only](#) [Title Only](#) [Author and Title](#)

Carretero-Paulet, L., Galstyan, A., Roig-Villanova, I., Martinez-Garcia, J.F., Bilbao-Castro, J.R., and Robertson, D.L. (2010). Genome-wide classification and evolutionary analysis of the bHLH family of transcription factors in *Arabidopsis*, poplar, rice, moss, and algae. *Plant Physiol* 153, 1398-1412.

Google Scholar: [Author Only](#) [Title Only](#) [Author and Title](#)

Clough, S.J., and Bent, A.F. (1998). Floral dip: a simplified method for *Agrobacterium*-mediated transformation of *Arabidopsis thaliana*. *Plant J* 16, 735-743.

Google Scholar: [Author Only](#) [Title Only](#) [Author and Title](#)

Cuellar, A.P., Pauwels, L., De Clercq, R., and Goossens, A. (2013). Yeast two-hybrid analysis of jasmonate signaling proteins. *Methods Mol Biol* 1011, 173-185.

Google Scholar: [Author Only](#) [Title Only](#) [Author and Title](#)

Cui, D., Zhao, S., Xu, H., Allan, A.C., Zhang, X., Fan, L., Chen, L., Su, J., Shu, Q., and Li, K. (2021). The interaction of MYB, bHLH and WD40 transcription factors in red pear (*Pyrus pyrifolia*) peel. *Plant Mol Biol* 106, 407-417.

Google Scholar: [Author Only](#) [Title Only](#) [Author and Title](#)

De Rybel, B., Mahonen, A.P., Helariutta, Y., and Weijers, D. (2016). Plant vascular development: from early specification to differentiation. *Nat Rev Mol Cell Biol* 17, 30-40.

Google Scholar: [Author Only](#) [Title Only](#) [Author and Title](#)

De Rybel, B., Moller, B., Yoshida, S., Grabowicz, I., Barbier de Reuille, P., Boeren, S., Smith, R.S., Borst, J.W., and Weijers, D. (2013). A bHLH complex controls embryonic vascular tissue establishment and indeterminate growth in *Arabidopsis*. *Dev Cell* 24, 426-437.

Google Scholar: [Author Only](#) [Title Only](#) [Author and Title](#)

De Rybel, B., Adibi, M., Breda, A.S., Wendrich, J.R., Smit, M.E., Novak, O., Yamaguchi, N., Yoshida, S., Van Isterdael, G., Palovaara, J., Nijse, B., Boeschoten, M.V., Hooiveld, G., Beeckman, T., Wagner, D., Ljung, K., Fleck, C., and Weijers, D. (2014). Plant development. Integration of growth and patterning during vascular tissue formation in *Arabidopsis*. *Science* 345, 1255-1261.

Google Scholar: [Author Only](#) [Title Only](#) [Author and Title](#)

Du, H., Zhang, L., Liu, L., Tang, X.F., Yang, W.J., Wu, Y.M., Huang, Y.B., and Tang, Y.X. (2009). Biochemical and molecular characterization of plant MYB transcription factor family. *Biochemistry (Mosc)* 74, 1-11.

Google Scholar: [Author Only](#) [Title Only](#) [Author and Title](#)

Dubos, C., Stracke, R., Grotewold, E., Weisshaar, B., Martin, C., and Lepiniec, L. (2010). MYB transcription factors in *Arabidopsis*. *Trends Plant Sci* 15, 573-581.

Google Scholar: [Author Only](#) [Title Only](#) [Author and Title](#)

Feller, A., Machemer, K., Braun, E.L., and Grotewold, E. (2011). Evolutionary and comparative analysis of MYB and bHLH plant transcription factors. *Plant J* 66, 94-116.

Google Scholar: [Author Only](#) [Title Only](#) [Author and Title](#)

Forkmann, G., and Martens, S. (2001). Metabolic engineering and applications of flavonoids. *Curr Opin Biotech* 12, 155-160.

Google Scholar: [Author Only](#) [Title Only](#) [Author and Title](#)

Jin, H., and Martin, C. (1999). Multifunctionality and diversity within the plant MYB-gene family. *Plant Mol Biol* 41, 577-585.

Google Scholar: [Author Only](#) [Title Only](#) [Author and Title](#)

Kagale, S., and Rozwadowski, K. (2011). EAR motif-mediated transcriptional repression in plants: an underlying mechanism for epigenetic regulation of gene expression. *Epigenetics* 6, 141-146.



Google Scholar: [Author Only](#) [Title Only](#) [Author and Title](#)

**Karabourniotis, G., Liakopoulos, G., Nikolopoulos, D., and Bresta, P. (2020). Protective and defensive roles of non-glandular trichomes against multiple stresses: structure-function coordination. J Forestry Res 31, 1-12.**

Google Scholar: [Author Only](#) [Title Only](#) [Author and Title](#)

**Karimi, M., Inze, D., and Depicker, A. (2002). GATEWAY vectors for Agrobacterium-mediated plant transformation. Trends Plant Sci 7, 193-195.**

Google Scholar: [Author Only](#) [Title Only](#) [Author and Title](#)

**Katayama, H., Iwamoto, K., Kariya, Y., Asakawa, T., Kan, T., Fukuda, H., and Ohashi-Ito, K. (2015). A Negative Feedback Loop Controlling bHLH Complexes Is Involved in Vascular Cell Division and Differentiation in the Root Apical Meristem. Curr Biol 25, 3144-3150.**

Google Scholar: [Author Only](#) [Title Only](#) [Author and Title](#)

**Kazan, K. (2006). Negative regulation of defence and stress genes by EAR-motif-containing repressors. Trends Plant Sci 11, 109-112.**

Google Scholar: [Author Only](#) [Title Only](#) [Author and Title](#)

**Kieber, J.J., and Schaller, G.E. (2018). Cytokinin signaling in plant development. Development 145.**

Google Scholar: [Author Only](#) [Title Only](#) [Author and Title](#)

**Kirik, V., Simon, M., Huelskamp, M., and Schiefelbein, J. (2004). The ENHANCER OF TRY AND CPC1 gene acts redundantly with TRIPTYCHON and CAPRICE in trichome and root hair cell patterning in Arabidopsis. Dev Biol 268, 506-513.**

Google Scholar: [Author Only](#) [Title Only](#) [Author and Title](#)

**Krogan, N.T., and Long, J.A. (2009). Why so repressed? Turning off transcription during plant growth and development. Current Opinion in Plant Biology 12, 628-636.**

Google Scholar: [Author Only](#) [Title Only](#) [Author and Title](#)

**Kurakawa, T., Ueda, N., Maekawa, M., Kobayashi, K., Kojima, M., Nagato, Y., Sakakibara, H., and Kyojuka, J. (2007). Direct control of shoot meristem activity by a cytokinin-activating enzyme. Nature 445, 652-655.**

Google Scholar: [Author Only](#) [Title Only](#) [Author and Title](#)

**Kuroha, T., Tokunaga, H., Kojima, M., Ueda, N., Ishida, T., Nagawa, S., Fukuda, H., Sugimoto, K., and Sakakibara, H. (2009). Functional analyses of LONELY GUY cytokinin-activating enzymes reveal the importance of the direct activation pathway in Arabidopsis. Plant Cell 21, 3152-3169.**

Google Scholar: [Author Only](#) [Title Only](#) [Author and Title](#)

**Lee, M.M., and Schiefelbein, J. (1999). WEREWOLF, a MYB-related protein in Arabidopsis, is a position-dependent regulator of epidermal cell patterning. Cell 99, 473-483.**

Google Scholar: [Author Only](#) [Title Only](#) [Author and Title](#)

**Lepiniec, L., Debeaujon, I., Routaboul, J.M., Baudry, A., Pourcel, L., Nesi, N., and Caboche, M. (2006). Genetics and biochemistry of seed flavonoids. Annu Rev Plant Biol 57, 405-430.**

Google Scholar: [Author Only](#) [Title Only](#) [Author and Title](#)

**Liu, J., Osbourn, A., and Ma, P. (2015). MYB Transcription Factors as Regulators of Phenylpropanoid Metabolism in Plants. Mol Plant 8, 689-708.**

Google Scholar: [Author Only](#) [Title Only](#) [Author and Title](#)

**Ma, D., and Constabel, C.P. (2019). MYB Repressors as Regulators of Phenylpropanoid Metabolism in Plants. Trends Plant Sci 24, 275-289.**

Google Scholar: [Author Only](#) [Title Only](#) [Author and Title](#)

**Maes, L., Inze, D., and Goossens, A. (2008). Functional specialization of the TRANSPARENT TESTA GLABRA1 network allows differential hormonal control of laminal and marginal trichome initiation in Arabidopsis rosette leaves. Plant Physiol 148, 1453-1464.**

Google Scholar: [Author Only](#) [Title Only](#) [Author and Title](#)

**Mehrtens, F., Kranz, H., Bednarek, P., and Weisshaar, B. (2005). The Arabidopsis transcription factor MYB12 is a flavonol-specific regulator of phenylpropanoid biosynthesis. Plant Physiol 138, 1083-1096.**

Google Scholar: [Author Only](#) [Title Only](#) [Author and Title](#)

**Meijering, E., Jacob, M., Sarria, J.C., Steiner, P., Hirling, H., and Unser, M. (2004). Design and validation of a tool for neurite tracing and analysis in fluorescence microscopy images. Cytometry A 58, 167-176.**

Google Scholar: [Author Only](#) [Title Only](#) [Author and Title](#)

**Micol-Ponce, R., Aguilera, V., and Ponce, M.R. (2014). A genetic screen for suppressors of a hypomorphic allele of Arabidopsis ARGONAUTE1. Sci Rep 4, 5533.**

Google Scholar: [Author Only](#) [Title Only](#) [Author and Title](#)

Miyashima, S., Roszak, P., Sevilem, I., Toyokura, K., Blob, B., Heo, J.O., Mellor, N., Help-Rinta-Rahko, H., Otero, S., Smet, W., Boekschoten, M., Hooiveld, G., Hashimoto, K., Smetana, O., Siligato, R., Wallner, E.S., Mahonen, A.P., Kondo, Y., Melnyk, C.W., Greb, T., Nakajima, K., Sozzani, R., Bishopp, A., De Rybel, B., and Helariutta, Y. (2019). Mobile PEAR transcription factors integrate positional cues to prime cambial growth. *Nature* 565, 490-494.

Google Scholar: [Author Only](#) [Title Only](#) [Author and Title](#)

Nesi, N., Debeaujon, I., Jond, C., Pelletier, G., Caboche, M., and Lepiniec, L. (2000). The TT8 gene encodes a basic helix-loop-helix domain protein required for expression of DFR and BAN genes in *Arabidopsis* siliques. *Plant Cell* 12, 1863-1878.

Google Scholar: [Author Only](#) [Title Only](#) [Author and Title](#)

Ogata, K., Kanei-Ishii, C., Sasaki, M., Hatanaka, H., Nagadoi, A., Enari, M., Nakamura, H., Nishimura, Y., Ishii, S., and Sarai, A. (1996). The cavity in the hydrophobic core of Myb DNA-binding domain is reserved for DNA recognition and trans-activation. *Nat Struct Biol* 3, 178-187.

Google Scholar: [Author Only](#) [Title Only](#) [Author and Title](#)

Ohashi-Ito, K., and Bergmann, D.C. (2007). Regulation of the *Arabidopsis* root vascular initial population by LONESOME HIGHWAY. *Development* 134, 2959-2968.

Google Scholar: [Author Only](#) [Title Only](#) [Author and Title](#)

Ohashi-Ito, K., and Fukuda, H. (2020). Transcriptional networks regulating root vascular development. *Curr Opin Plant Biol* 57, 118-123.

Google Scholar: [Author Only](#) [Title Only](#) [Author and Title](#)

Ohashi-Ito, K., Matsukawa, M., and Fukuda, H. (2013). An atypical bHLH transcription factor regulates early xylem development downstream of auxin. *Plant Cell Physiol* 54, 398-405.

Google Scholar: [Author Only](#) [Title Only](#) [Author and Title](#)

Ohashi-Ito, K., Saegusa, M., Iwamoto, K., Oda, Y., Katayama, H., Kojima, M., Sakakibara, H., and Fukuda, H. (2014). A bHLH complex activates vascular cell division via cytokinin action in root apical meristem. *Curr Biol* 24, 2053-2058.

Google Scholar: [Author Only](#) [Title Only](#) [Author and Title](#)

Oppenheimer, D.G., Herman, P.L., Sivakumaran, S., Esch, J., and Marks, M.D. (1991). A myb gene required for leaf trichome differentiation in *Arabidopsis* is expressed in stipules. *Cell* 67, 483-493.

Google Scholar: [Author Only](#) [Title Only](#) [Author and Title](#)

Otero S., S.I., Roszak P., Lu Y., Di Vittori V., Bourdon M., Kalmbach L., Blob B., Heo J., Peruzzo F., Laux T., Fernie A., Tavares H., Helariutta Y. (2021). An *Arabidopsis* root phloem pole cell atlas reveals PINEAPPLE genes as transitioners to autotrophy (BioRxiv). doi: <https://doi.org/10.1101/2021.08.31.458411>

Google Scholar: [Author Only](#) [Title Only](#) [Author and Title](#)

Parizot, B., Laplace, L., Ricaud, L., Boucheron-Dubuisson, E., Bayle, V., Bonke, M., De Smet, I., Poethig, S.R., Helariutta, Y., Haseloff, J., Chriqui, D., Beeckman, T., and Nussaume, L. (2008). Diarch symmetry of the vascular bundle in *Arabidopsis* root encompasses the pericycle and is reflected in distich lateral root initiation. *Plant Physiol* 146, 140-148.

Google Scholar: [Author Only](#) [Title Only](#) [Author and Title](#)

Ramsay, N.A., and Glover, B.J. (2005). MYB-bHLH-WD40 protein complex and the evolution of cellular diversity. *Trends Plant Sci* 10, 63-70.

Google Scholar: [Author Only](#) [Title Only](#) [Author and Title](#)

Schindelin, J., Arganda-Carreras, I., Frise, E., Kaynig, V., Longair, M., Pietzsch, T., Preibisch, S., Rueden, C., Saalfeld, S., Schmid, B., Tinevez, J.Y., White, D.J., Hartenstein, V., Eliceiri, K., Tomancak, P., and Cardona, A. (2012). Fiji: an open-source platform for biological-image analysis. *Nat Methods* 9, 676-682.

Google Scholar: [Author Only](#) [Title Only](#) [Author and Title](#)

Schneeberger, K., Ossowski, S., Lanz, C., Juul, T., Petersen, A.H., Nielsen, K.L., Jorgensen, J.E., Weigel, D., and Andersen, S.U. (2009). SHOREmap: simultaneous mapping and mutation identification by deep sequencing. *Nat Methods* 6, 550-551.

Google Scholar: [Author Only](#) [Title Only](#) [Author and Title](#)

Smet, W., Sevilem, I., de Luis Balaguer, M.A., Wybouw, B., Mor, E., Miyashima, S., Blob, B., Roszak, P., Jacobs, T.B., Boekschoten, M., Hooiveld, G., Sozzani, R., Helariutta, Y., and De Rybel, B. (2019). DOF2.1 Controls Cytokinin-Dependent Vascular Cell Proliferation Downstream of TMO5/LHW. *Curr Biol* 29, 520-529 e526.

Google Scholar: [Author Only](#) [Title Only](#) [Author and Title](#)

Song, S.K., Kwak, S.H., Chang, S.C., Schiefelbein, J., and Lee, M.M. (2015). WEREWOLF and ENHANCER of GLABRA3 are interdependent regulators of the spatial expression pattern of GLABRA2 in *Arabidopsis*. *Biochem Biophys Res Commun* 467, 94-100.

Google Scholar: [Author Only](#) [Title Only](#) [Author and Title](#)

Stracke, R., Werber, M., and Weisshaar, B. (2001). The R2R3-MYB gene family in *Arabidopsis thaliana*. *Curr Opin Plant Biol* 4, 447-456.

Google Scholar: [Author Only](#) [Title Only](#) [Author and Title](#)

**Stracke, R., Turgut-Kara, N., and Weisshaar, B. (2017). The AtMYB12 activation domain maps to a short C-terminal region of the transcription factor. Z Naturforsch C 72, 251-257.**

Google Scholar: [Author Only](#) [Title Only](#) [Author and Title](#)

**Stracke, R., Ishihara, H., Huep, G., Barsch, A., Mehrtens, F., Niehaus, K., and Weisshaar, B. (2007). Differential regulation of closely related R2R3-MYB transcription factors controls flavonol accumulation in different parts of the Arabidopsis thaliana seedling. Plant J 50, 660-677.**

Google Scholar: [Author Only](#) [Title Only](#) [Author and Title](#)

**Stracke, R., Jahns, O., Keck, M., Tohge, T., Niehaus, K., Fernie, A.R., and Weisshaar, B. (2010). Analysis of PRODUCTION OF FLAVONOL GLYCOSIDES-dependent flavonol glycoside accumulation in Arabidopsis thaliana plants reveals MYB11-, MYB12- and MYB111-independent flavonol glycoside accumulation. New Phytol 188, 985-1000.**

Google Scholar: [Author Only](#) [Title Only](#) [Author and Title](#)

**Tominaga-Wada, R., Kurata, T., and Wada, T. (2017). Localization of ENHANCER OF TRY AND CPC1 protein in Arabidopsis root epidermis. J Plant Physiol 214, 48-52.**

Google Scholar: [Author Only](#) [Title Only](#) [Author and Title](#)

**Truernit, E., Bauby, H., Dubreucq, B., Grandjean, O., Runions, J., Barthelemy, J., and Palauqui, J.C. (2008). High-resolution whole-mount imaging of three-dimensional tissue organization and gene expression enables the study of Phloem development and structure in Arabidopsis. The Plant cell 20, 1494-1503.**

Google Scholar: [Author Only](#) [Title Only](#) [Author and Title](#)

**Vera-Sirera, F., De Rybel, B., Urbez, C., Kouklas, E., Pesquera, M., Alvarez-Mahecha, J.C., Minguet, E.G., Tuominen, H., Carbonell, J., Borst, J.W., Weijers, D., and Blazquez, M.A. (2015). A bHLH-Based Feedback Loop Restricts Vascular Cell Proliferation in Plants. Dev Cell 35, 432-443.**

Google Scholar: [Author Only](#) [Title Only](#) [Author and Title](#)

**Wada, T., Tachibana, T., Shimura, Y., and Okada, K. (1997). Epidermal cell differentiation in Arabidopsis determined by a Myb homolog, CPC. Science 277, 1113-1116.**

Google Scholar: [Author Only](#) [Title Only](#) [Author and Title](#)

**Wang, F., Kong, W., Wong, G., Fu, L., Peng, R., Li, Z., and Yao, Q. (2016). AtMYB12 regulates flavonoids accumulation and abiotic stress tolerance in transgenic Arabidopsis thaliana. Mol Genet Genomics 291, 1545-1559.**

Google Scholar: [Author Only](#) [Title Only](#) [Author and Title](#)

**Wang, S., and Chen, J.G. (2014). Regulation of cell fate determination by single-repeat R3 MYB transcription factors in Arabidopsis. Front Plant Sci 5, 133.**

Google Scholar: [Author Only](#) [Title Only](#) [Author and Title](#)

**Wang, S., Hubbard, L., Chang, Y., Guo, J., Schiefelbein, J., and Chen, J.G. (2008). Comprehensive analysis of single-repeat R3 MYB proteins in epidermal cell patterning and their transcriptional regulation in Arabidopsis. BMC Plant Biol 8, 81.**

Google Scholar: [Author Only](#) [Title Only](#) [Author and Title](#)

**Weijers, D., Franke-van Dijk, M., Vencken, R.J., Quint, A., Hooykaas, P., and Offringa, R. (2001). An Arabidopsis Minute-like phenotype caused by a semi-dominant mutation in a RIBOSOMAL PROTEIN S5 gene. Development 128, 4289-4299.**

Google Scholar: [Author Only](#) [Title Only](#) [Author and Title](#)

**Wendrich, J.R., Yang, B., Vandamme, N., Verstaen, K., Smet, W., Van de Velde, C., Minne, M., Wybouw, B., Mor, E., Arents, H.E., Nolf, J., Van Duyse, J., Van Isterdael, G., Maere, S., Saeys, Y., and De Rybel, B. (2020). Vascular transcription factors guide plant epidermal responses to limiting phosphate conditions. Science 370.**

Google Scholar: [Author Only](#) [Title Only](#) [Author and Title](#)

**Winkel-Shirley, B. (2001). Flavonoid biosynthesis. A colorful model for genetics, biochemistry, cell biology, and biotechnology. Plant Physiol 126, 485-493.**

Google Scholar: [Author Only](#) [Title Only](#) [Author and Title](#)

**Winkler, J., Mylle, E., De Meyer, A., Pavie, B., Merchie, J., Grones, P., and Van Damme, D.L. (2021). Visualizing protein-protein interactions in plants by rapamycin-dependent delocalization. Plant Cell 33, 1101-1117.**

Google Scholar: [Author Only](#) [Title Only](#) [Author and Title](#)

**Wybouw, B., and De Rybel, B. (2019). Cytokinin - A Developing Story. Trends Plant Sci 24, 177-185.**

Google Scholar: [Author Only](#) [Title Only](#) [Author and Title](#)

**Xu, W., Dubos, C., and Lepiniec, L. (2015). Transcriptional control of flavonoid biosynthesis by MYB-bHLH-WDR complexes. Trends Plant Sci 20, 176-185.**

Google Scholar: [Author Only](#) [Title Only](#) [Author and Title](#)

**Xu, W., Grain, D., Le Gourrierec, J., Harscoet, E., Berger, A., Jauvion, V., Scagnelli, A., Berger, N., Bidzinski, P., Kelemen, Z.,**

**Salsac, F., Baudry, A., Routaboul, J.M., Lepiniec, L., and Dubos, C. (2013). Regulation of flavonoid biosynthesis involves an unexpected complex transcriptional regulation of TT8 expression, in Arabidopsis. New Phytol 198, 59-70.**

Google Scholar: [Author Only](#) [Title Only](#) [Author and Title](#)

**Yang, B., Minne, M., Brunoni, F., Plackova, L., Petrik, I., Sun, Y., Nolf, J., Smet, W., Verstaen, K., Wendrich, J.R., Eekhout, T., Hoyerova, K., Van Isterdael, G., Haustraete, J., Bishopp, A., Farcot, E., Novak, O., Saeys, Y., and De Rybel, B. (2021). Non-cell autonomous and spatiotemporal signalling from a tissue organizer orchestrates root vascular development. Nat Plants 7, 1485-1494.**

Google Scholar: [Author Only](#) [Title Only](#) [Author and Title](#)

**Yperman, K., Wang, J., Eekhout, D., Winkler, J., Vu, L.D., Vandorpe, M., Grones, P., Mylle, E., Kraus, M., Merceron, R., Nolf, J., Mor, E., De Bruyn, P., Loris, R., Potocky, M., Savvides, S.N., De Rybel, B., De Jaeger, G., Van Damme, D., and Pleskot, R. (2021). Molecular architecture of the endocytic TPLATE complex. Sci Adv 7.**

Google Scholar: [Author Only](#) [Title Only](#) [Author and Title](#)

**Zhao, M., Morohashi, K., Hatlestad, G., Grotewold, E., and Lloyd, A. (2008). The TTG1-bHLH-MYB complex controls trichome cell fate and patterning through direct targeting of regulatory loci. Development 135, 1991-1999.**

Google Scholar: [Author Only](#) [Title Only](#) [Author and Title](#)

**Zimmermann, I.M., Heim, M.A., Weisshaar, B., and Uhrig, J.F. (2004). Comprehensive identification of Arabidopsis thaliana MYB transcription factors interacting with R/B-like BHLH proteins. Plant J 40, 22-34.**

Google Scholar: [Author Only](#) [Title Only](#) [Author and Title](#)
